# Supplementary material for: Organocatalytic asymmetric synthesis of oxazolidino spiropyrazolinonesvia N,O-acetalization/aza Michael addition domino reaction betweenN-Boc pyrazolinone ketimines and γ-hydroxyenones
Source: Royal Society of Chemistry journal article supplement (doi:10.1039/d2ob02290g), 2023-01-01
Supplement: d2ob02290g1.pdf [file d2ob02290g1.pdf]

## Supplementary Material

**Organocatalytic Asymmetric Synthesis of Oxazolidino Spiropyrazolinones via N,O-acetalization/aza Michael addition domino reaction between N-Boc pyrazolinone ketimines and  $\gamma$ -hydroxyenones.**

Marta Gil-Ordóñez,<sup>a</sup> Laura Martín,<sup>a</sup> Alicia Maestro<sup>a\*</sup> and José M. Andrés<sup>a\*</sup>

<sup>a</sup>GIR SintACat, Instituto CINQUIMA and Departamento de Química Orgánica, Facultad de Ciencias, Universidad de Valladolid, Paseo de Belén 7, 47011-Valladolid. Spain.

E-mail: [jmandres@uva.es](mailto:jmandres@uva.es)

### List of contents

|                                                         |     |
|---------------------------------------------------------|-----|
| 1. <sup>1</sup> H-NMR based kinetic experiment .....    | S2  |
| 2. NMR Spectra for New Compounds .....                  | S3  |
| 3. HPLC Profiles of the isolated compounds .....        | S18 |
| 4. Crystallographic data of spirocycle <b>3ab</b> ..... | S36 |

## 1. <sup>1</sup>H-NMR based kinetic experiment.

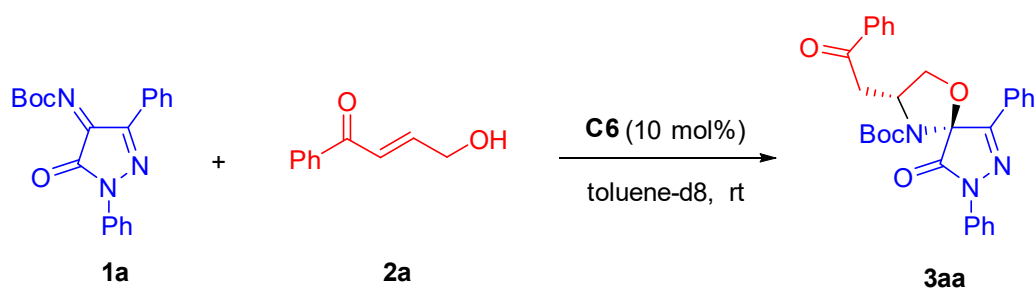

The catalyst **C6** (1.9 mg, 0.003 mmol, 0.1 equiv) and N-Boc ketimine **1a** (10 mg, 0.03 mmol) were added inside an NMR tube. Then, toluene-d8 (0.8 mL) was added before the NMR tube was cooled to -25°C. Hydroxyenone **2a** (7.3 mg, 0.045 mmol, 1.5 equiv.) was introduced to the tube. The tube was closed and then, taken out of the cool bath, shaken until total dissolution of starting materials and transferred to the NMR probe.

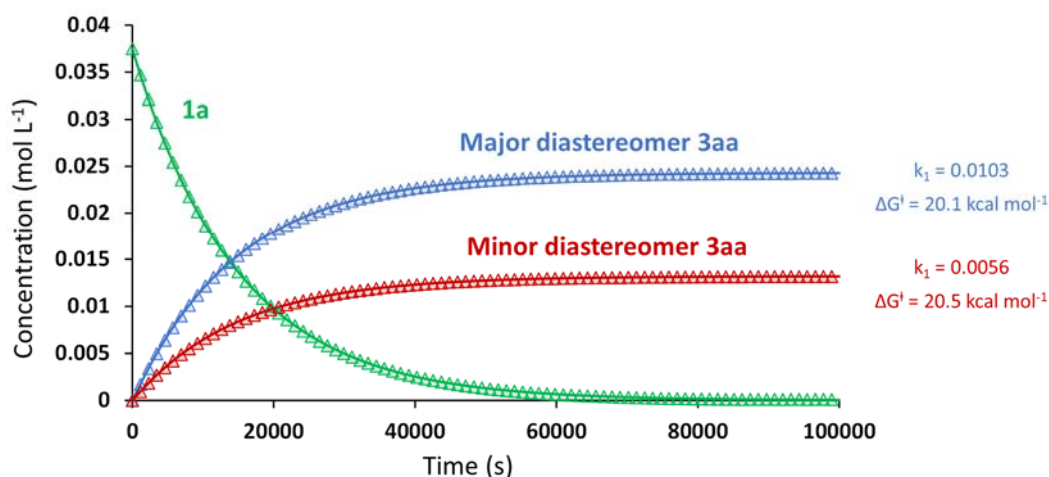

**Figure ES11.** <sup>1</sup>H-NMR monitoring of the reaction between N-Boc ketimine **1a** and hydroxyenone **2a** at room temperature. Lines represent kinetic fitting of data using COPASI software<sup>1</sup>.

| Parameter | Value  |
|-----------|--------|
| $k_1$     | 0.0103 |
| $k_2$     | 0.0056 |

**Table ES11:** Values of kinetic simulations constants.

<sup>1</sup> S. Hoops, S. Sahle, R. Gauges, C. Lee, J. Pahle, N. Simus, M. Singhal, L. Xu, P. Mendes, U. Kummer *Bioinformatics*, **2006**, *22*, 3067-74.

## 2. NMR Spectra for New Compounds.

*tert*-Butyl (3*R*,5*S*)-9-oxo-3-(2-oxo-2-phenylethyl)-6,8-diphenyl-1-oxa-4,7,8-triazaspiro[4.4]non-6-ene-4-carboxylate (3aa).

Major diastereomer

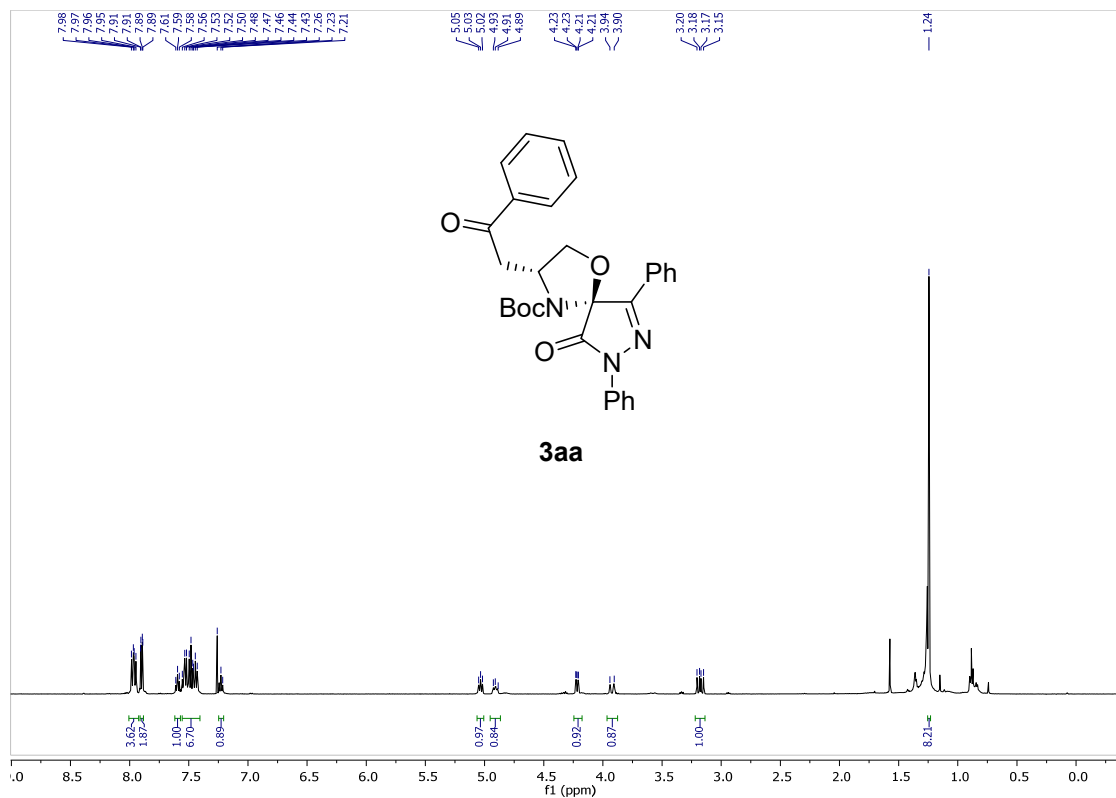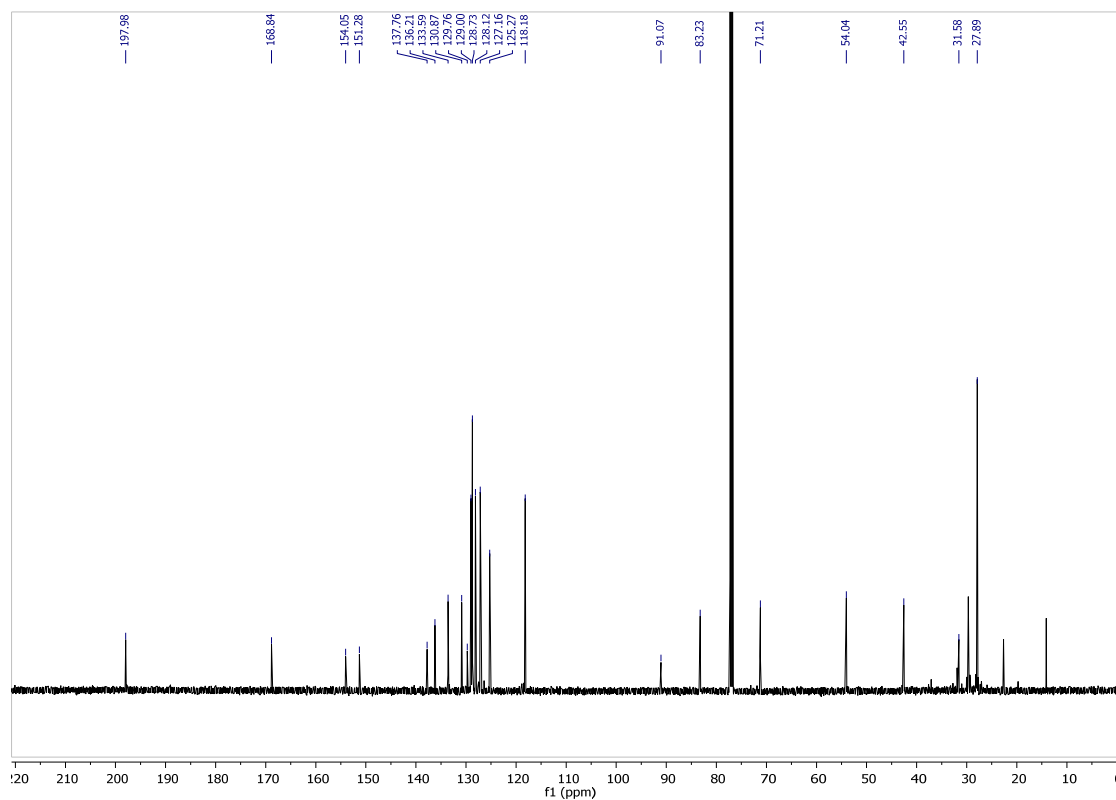

### Minor diastereomer (*epi*-3aa)

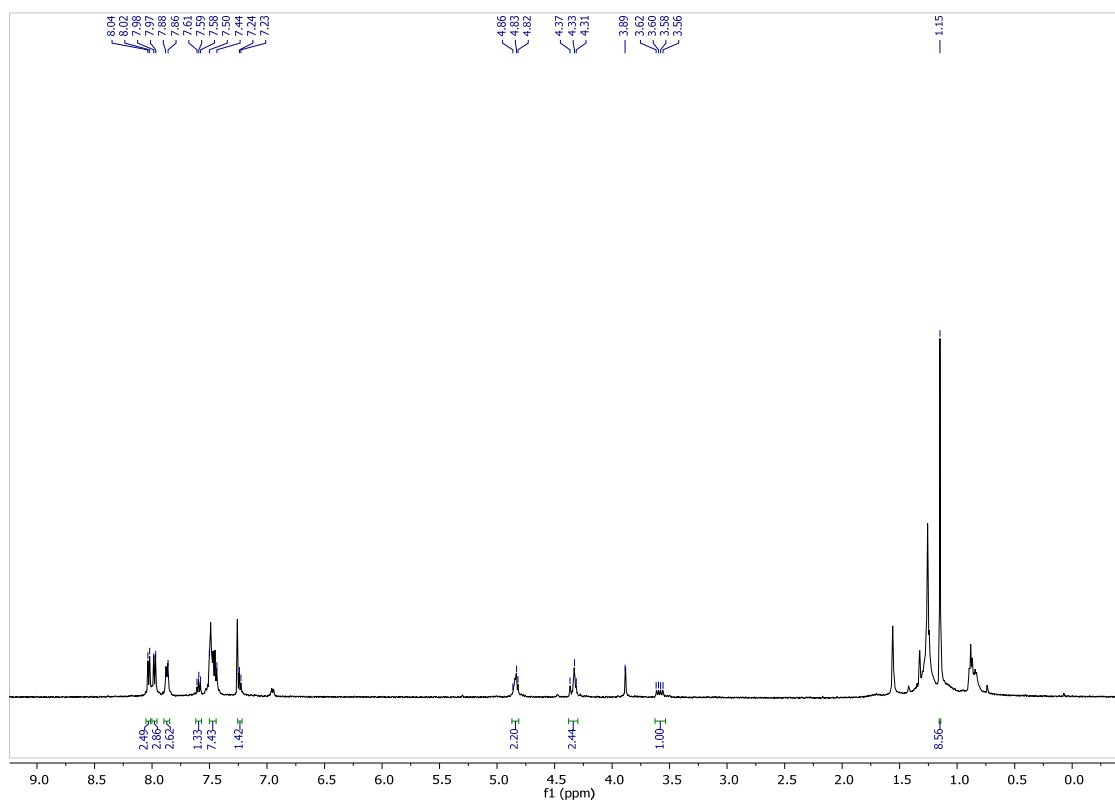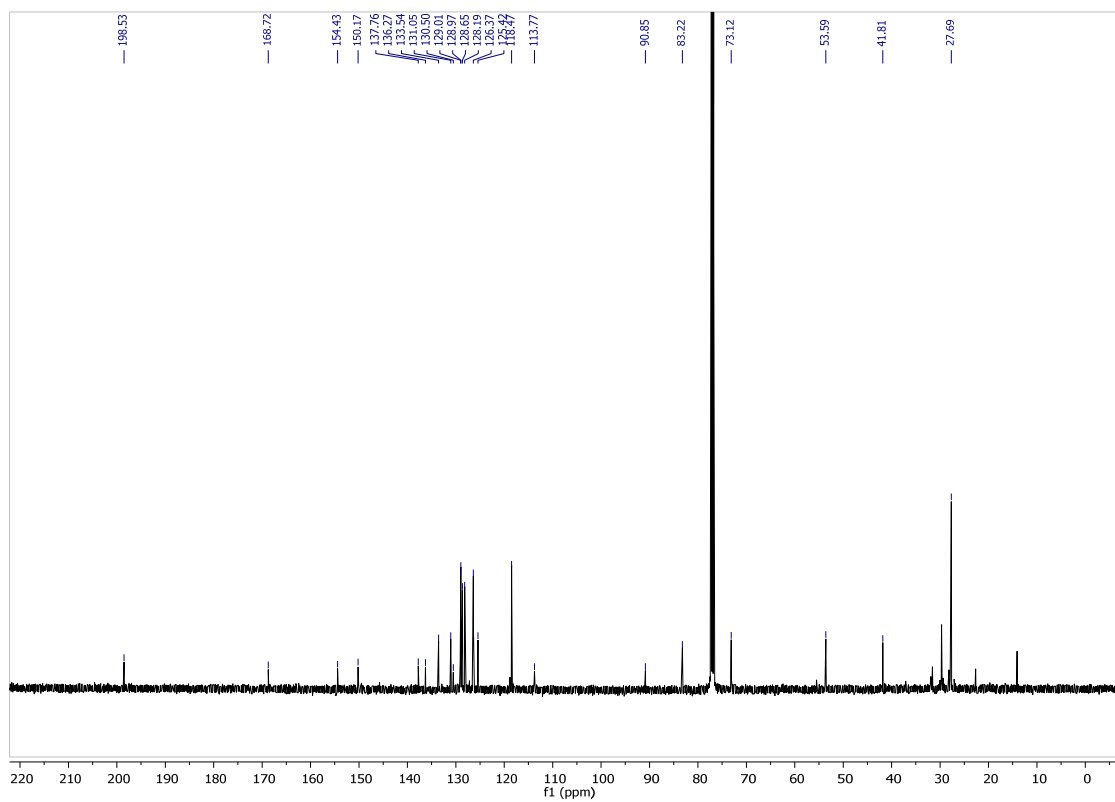

**tert-Butyl (3*R*,5*S*)-3-(2-(4-chlorophenyl)-2-oxoethyl)-9-oxo-6,8-diphenyl-1-oxa-4,7,8-triazaspiro[4.4]non-6-ene-4-carboxylate (3ab).**

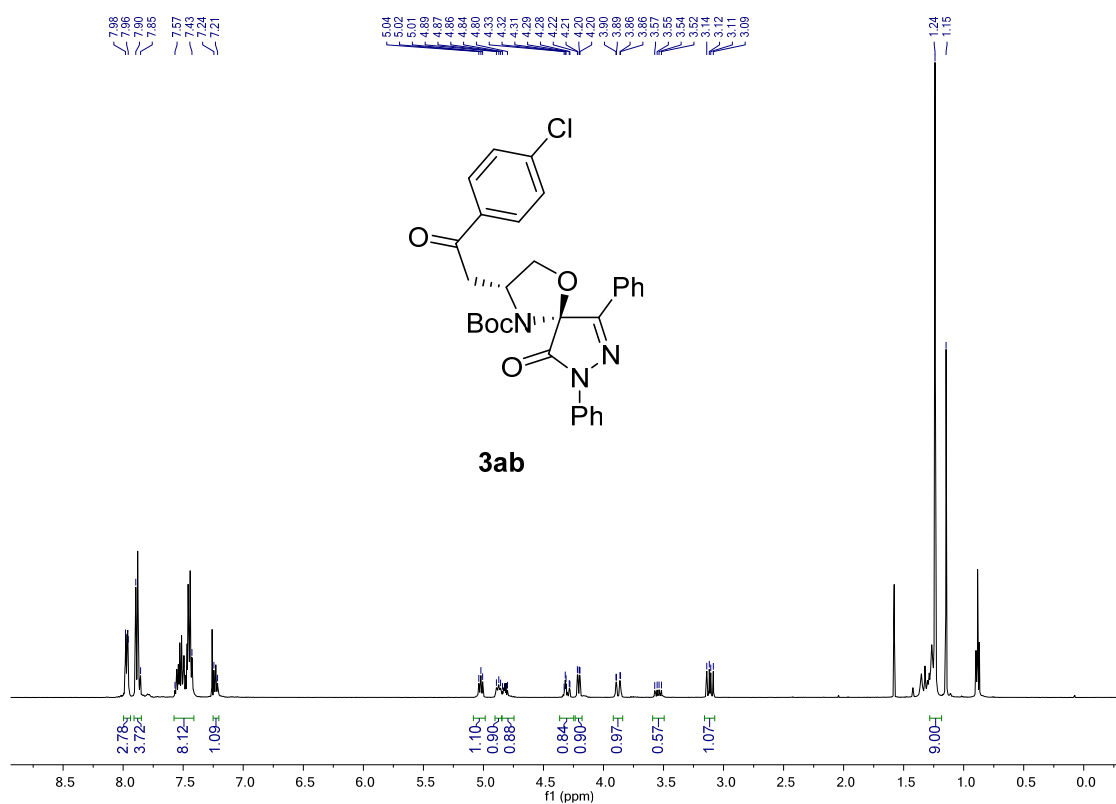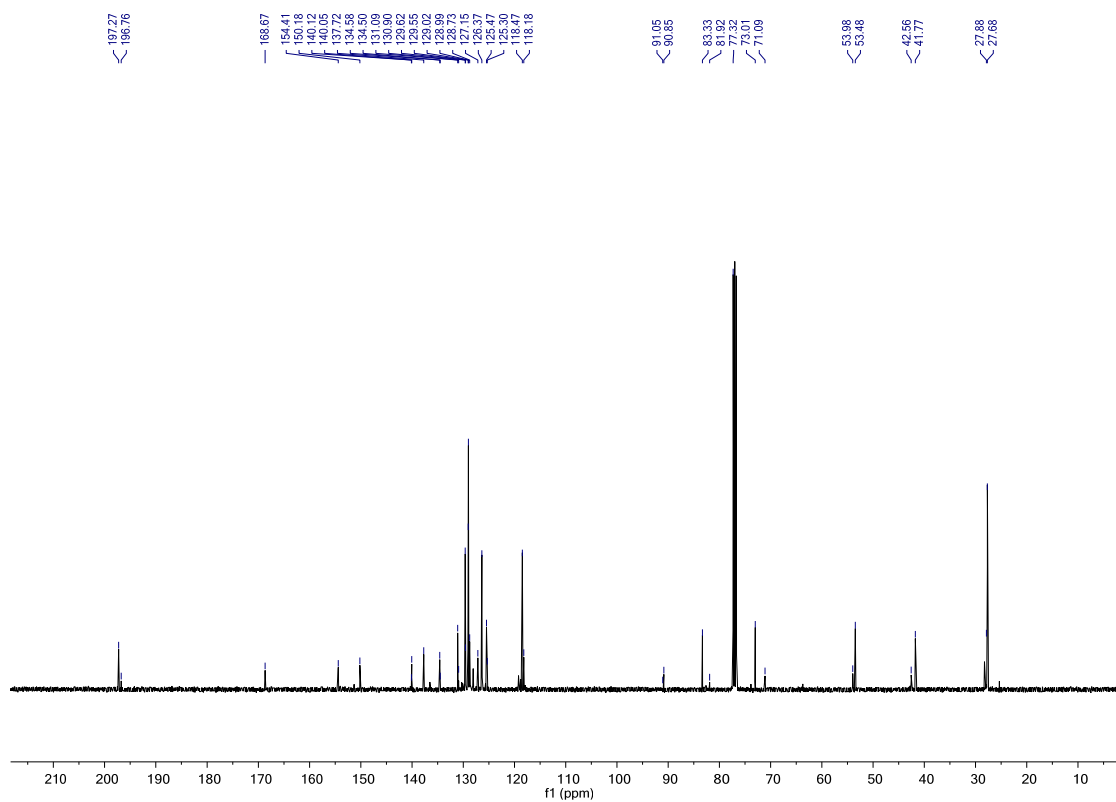

**tert-Butyl (3*R*,5*S*)-3-(2-(4-bromophenyl)-2-oxoethyl)-9-oxo-6,8-diphenyl-1-oxa-4,7,8-triazaspiro[4.4]non-6-ene-4-carboxylate (3*c*).**

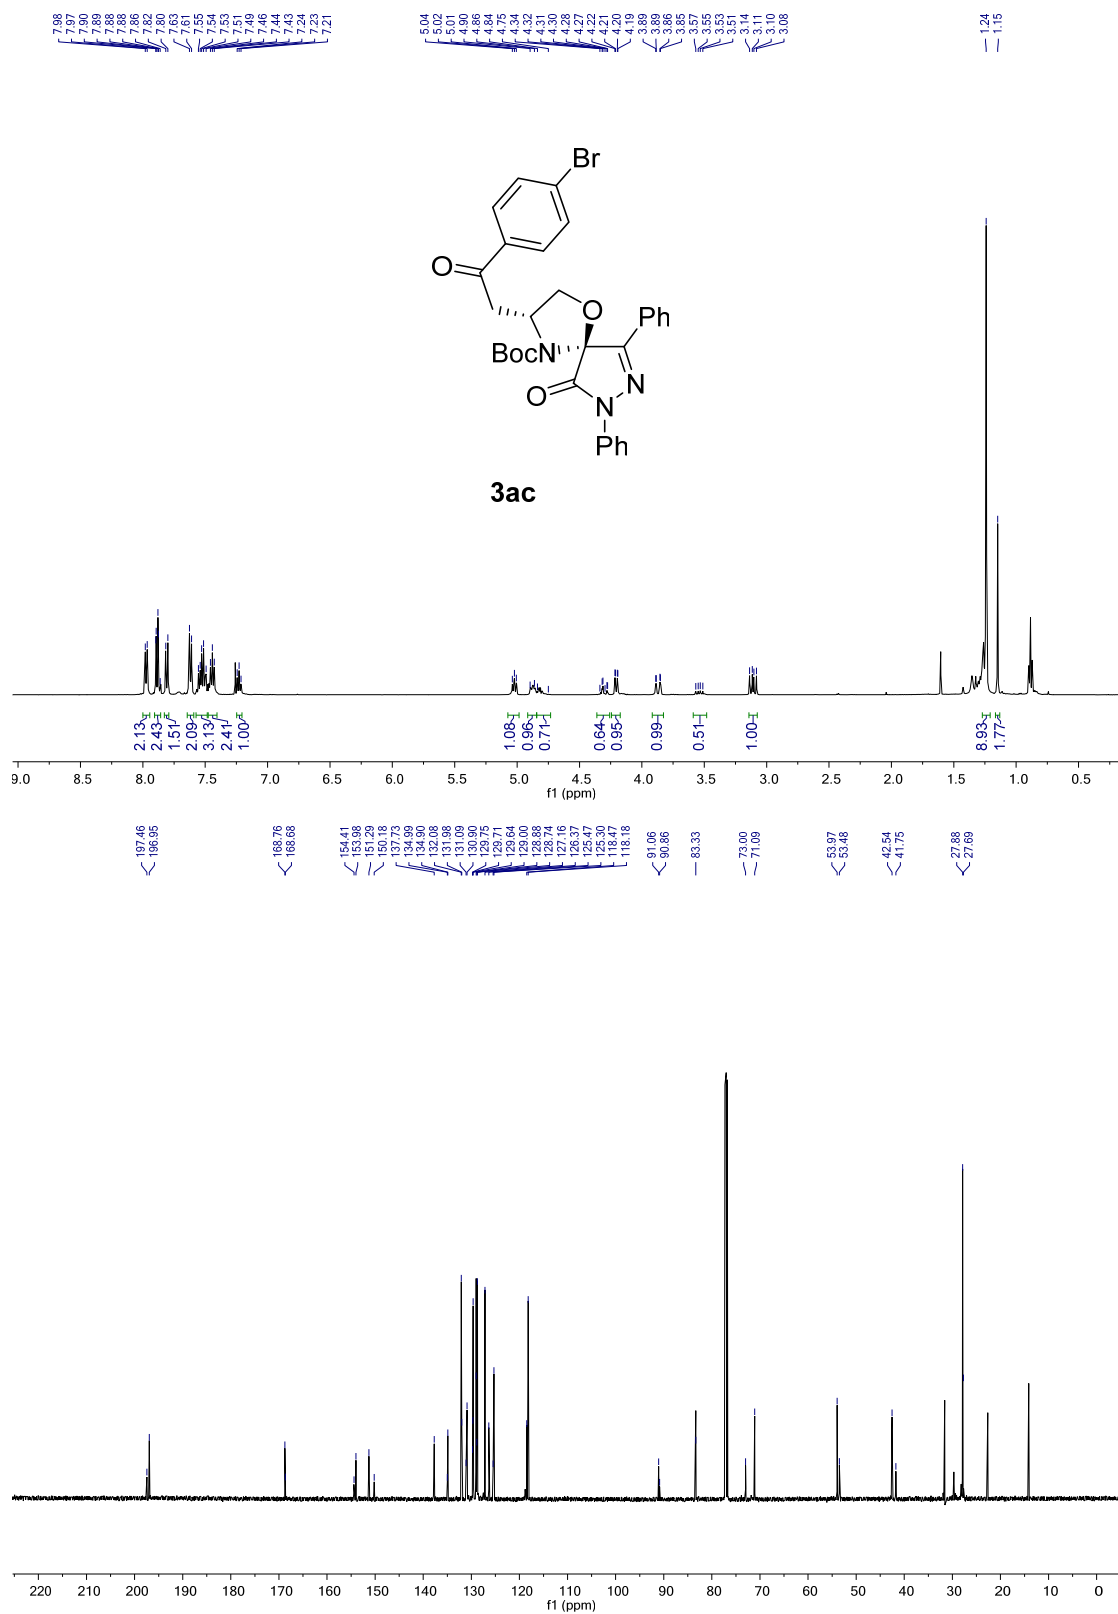

**tert-Butyl (3*R*,5*S*)-9-oxo-3-(2-oxo-2-(*p*-tolyl)ethyl)-6,8-diphenyl-1-oxa-4,7,8-triazaspiro[4.4]non-6-ene-4-carboxylate (3ad).**

**Major diastereomer**

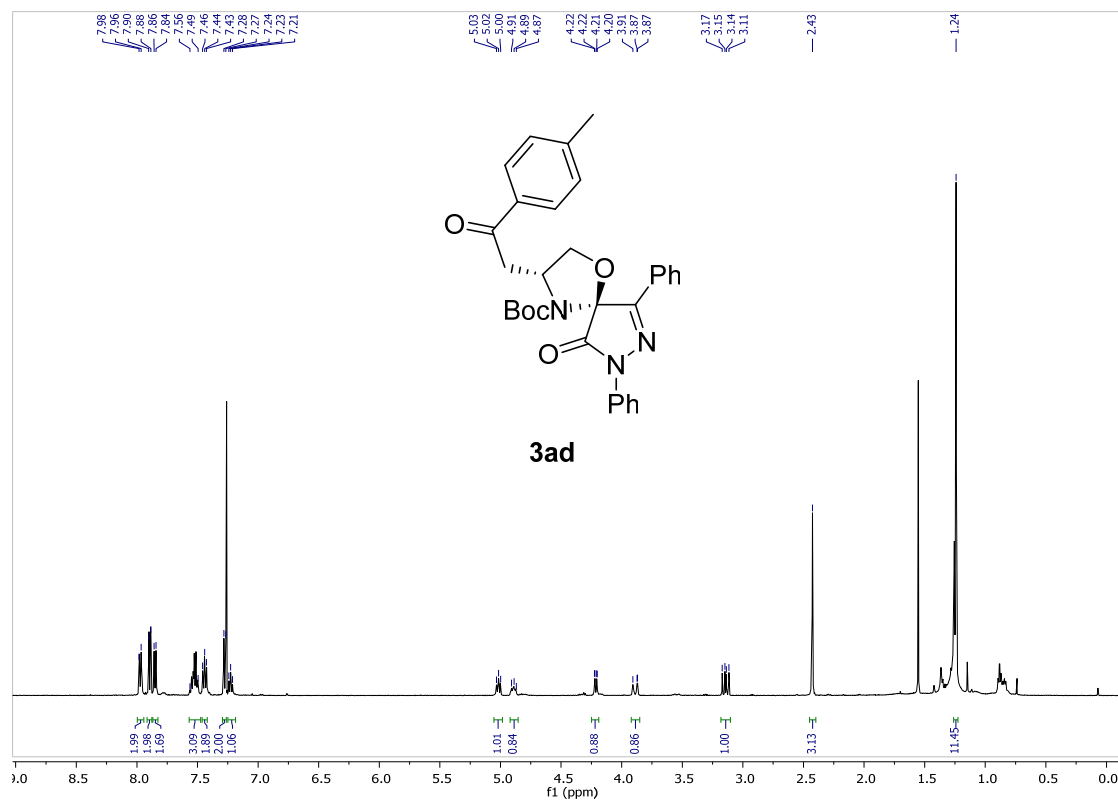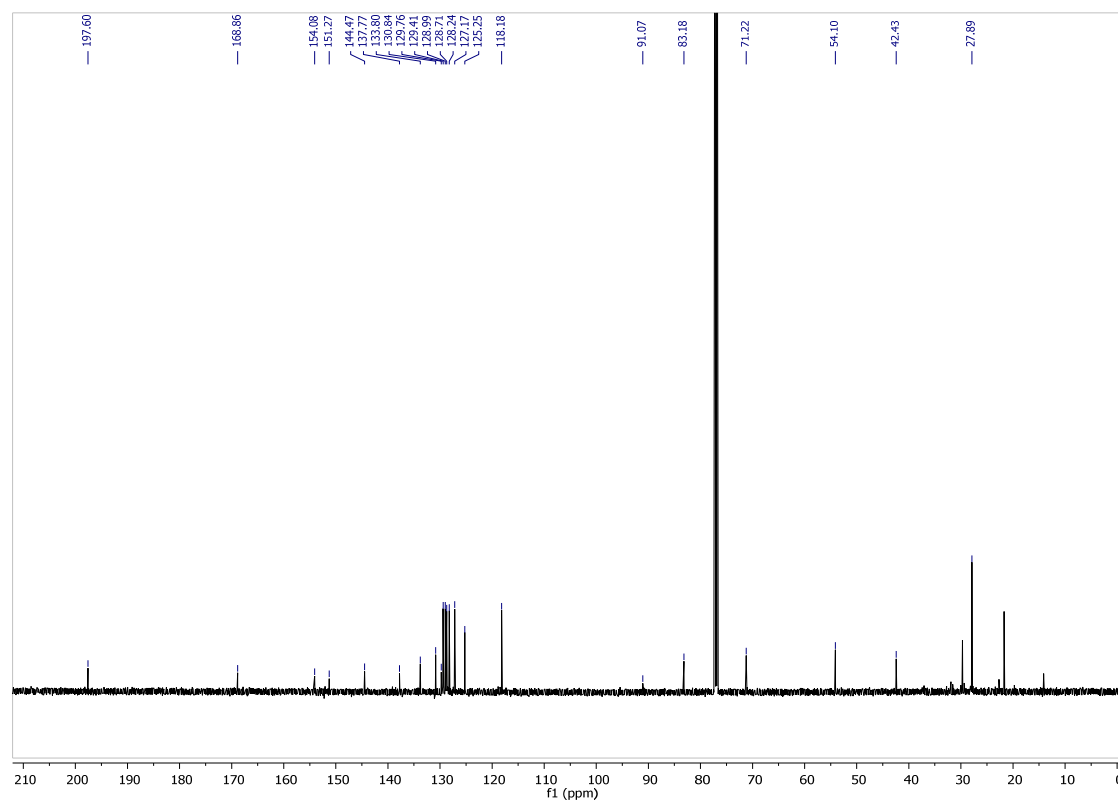

**tert-Butyl (3*R*,5*S*)-3-(2-(4-methoxyphenyl)-2-oxoethyl)-9-oxo-6,8-diphenyl-1-oxa-4,7,8-triazaspiro[4.4]non-6-ene-4-carboxylate (3ae).**

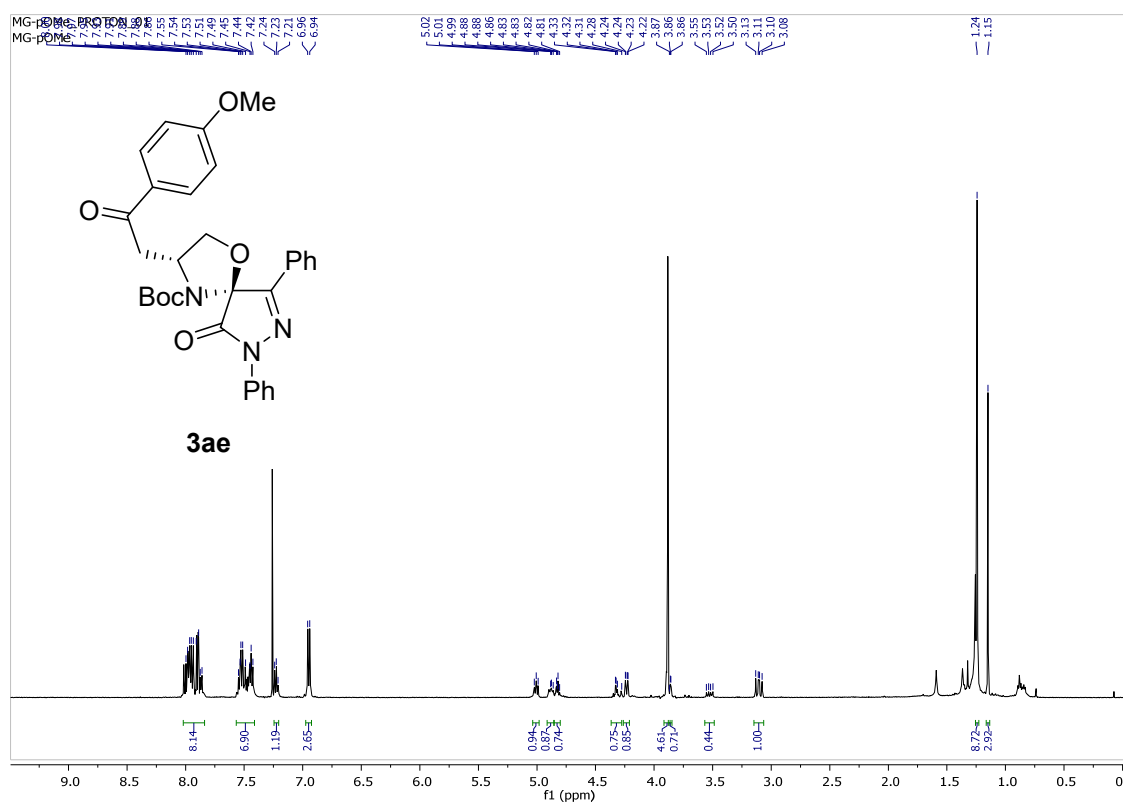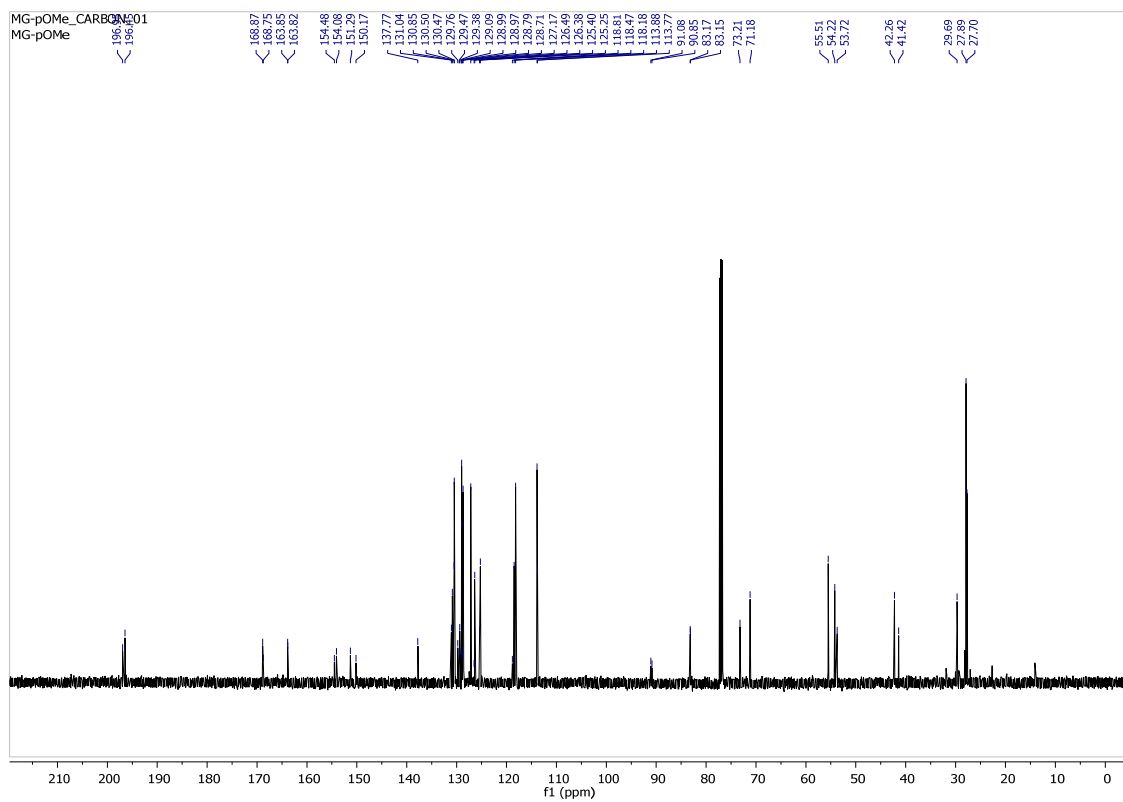



**tert-Butyl (3*R*,5*S*)-6-methyl-9-oxo-3-(2-oxo-2-phenylethyl)-8-phenyl-1-oxa-4,7,8-triazaspiro[4.4]non-6-ene-4-carboxylate (3ba).**

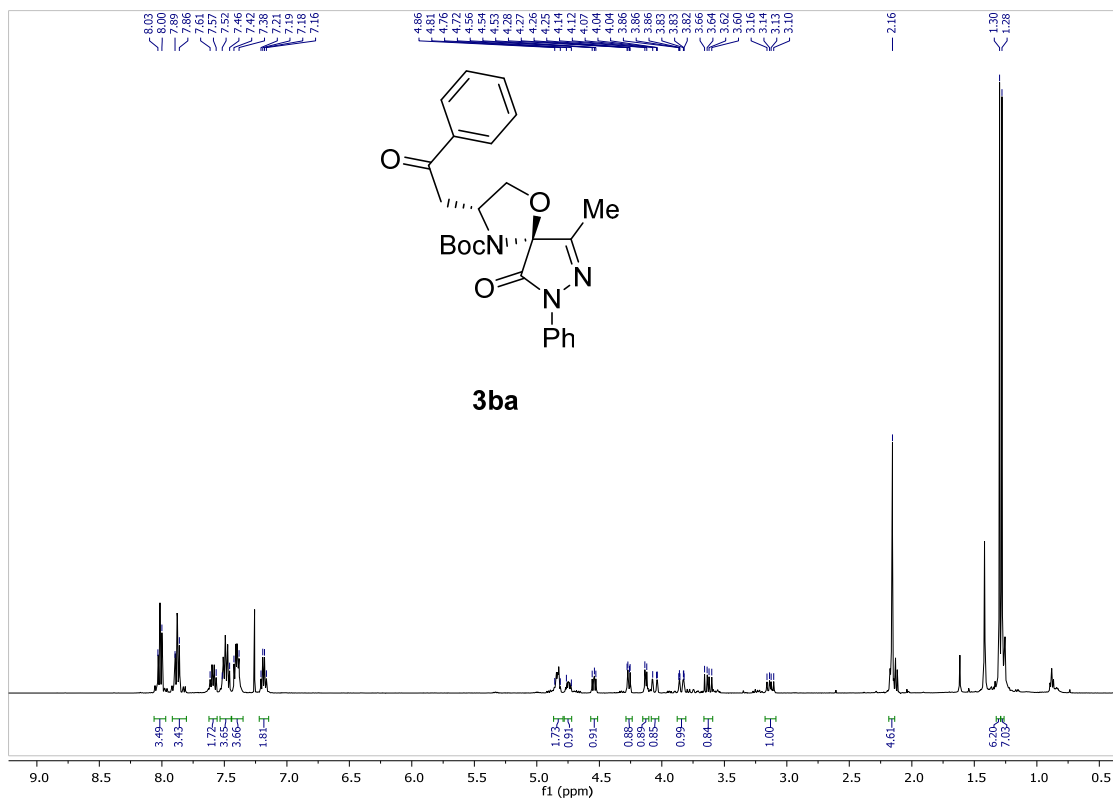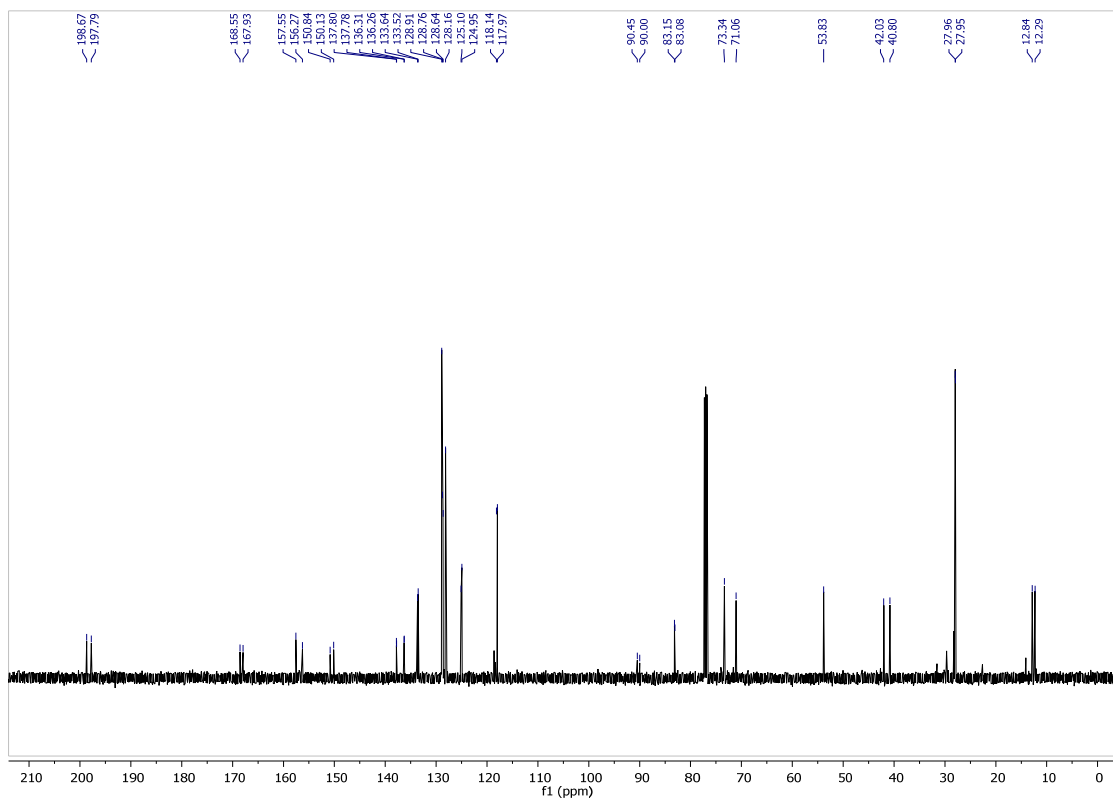

**tert-Butyl (3*R*,5*S*)-6-ethyl-9-oxo-3-(2-oxo-2-phenylethyl)-8-phenyl-1-oxa-4,7,8-triazaspiro[4.4]non-6-ene-4-carboxylate (3ca).**

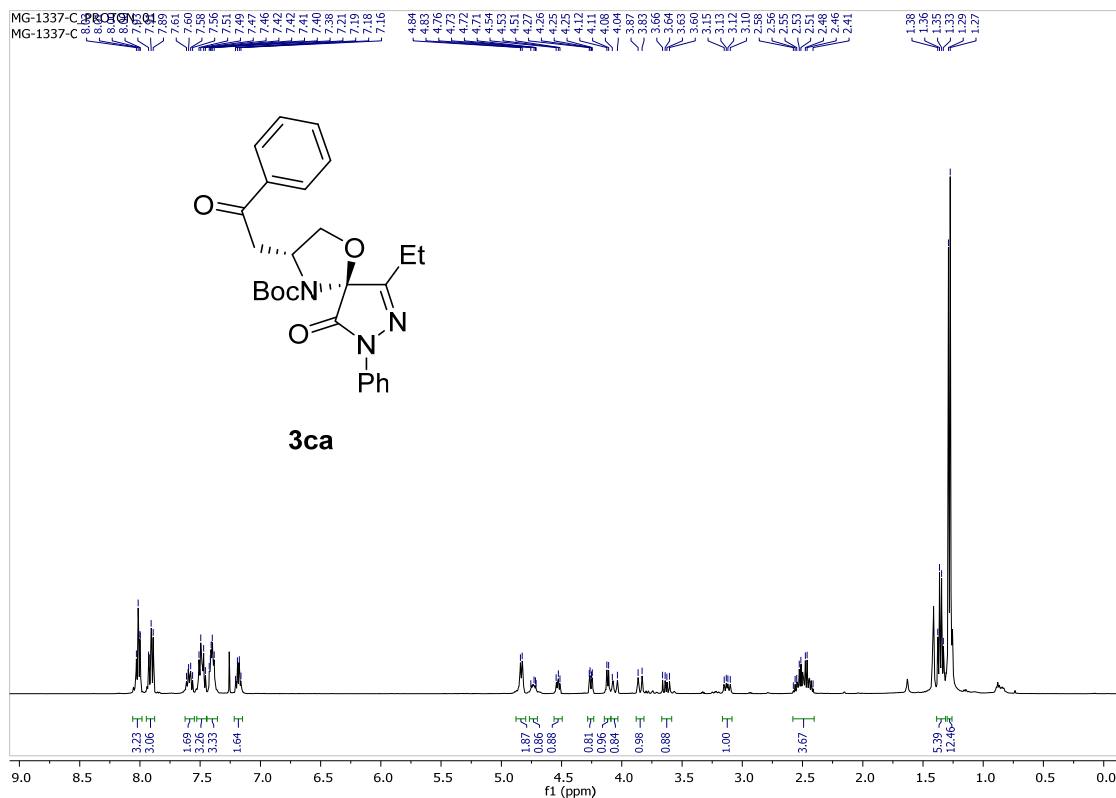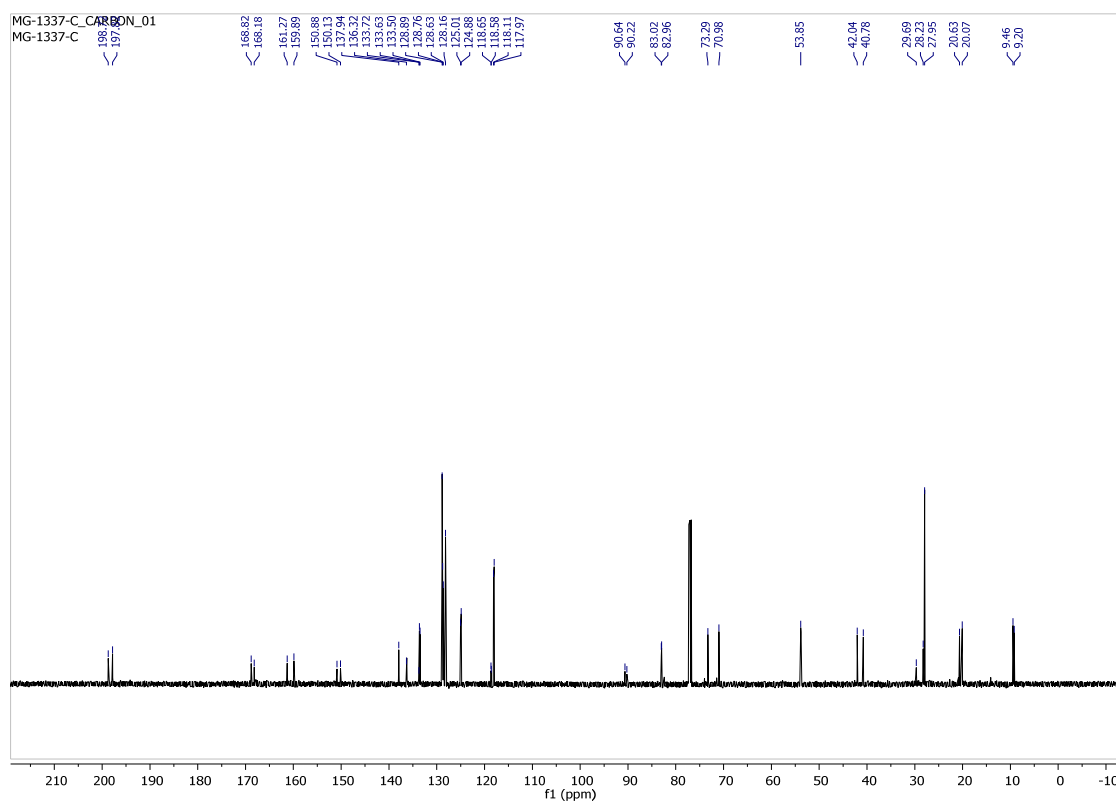

**tert-Butyl (3*R*,5*S*)-6-isopropyl-9-oxo-3-(2-oxo-2-phenylethyl)-8-phenyl-1-oxa-4,7,8-triazaspiro[4.4]non-6-ene-4-carboxylate (3da).**

**Major diastereomer**

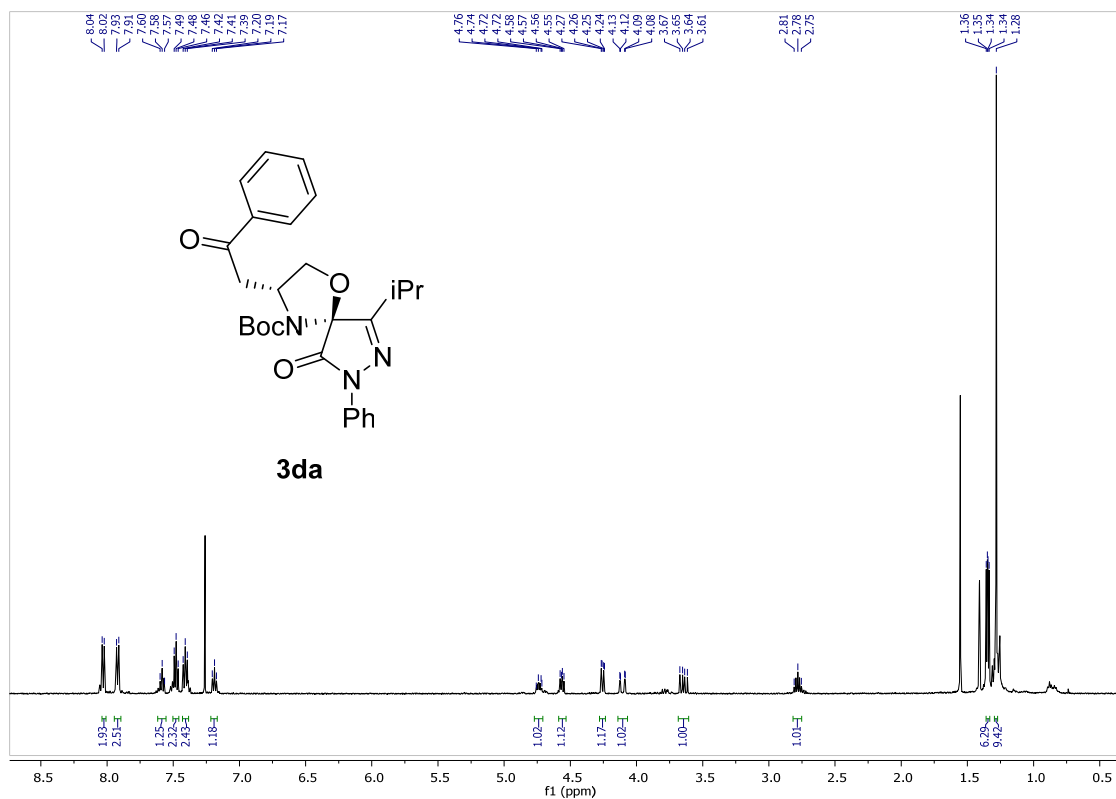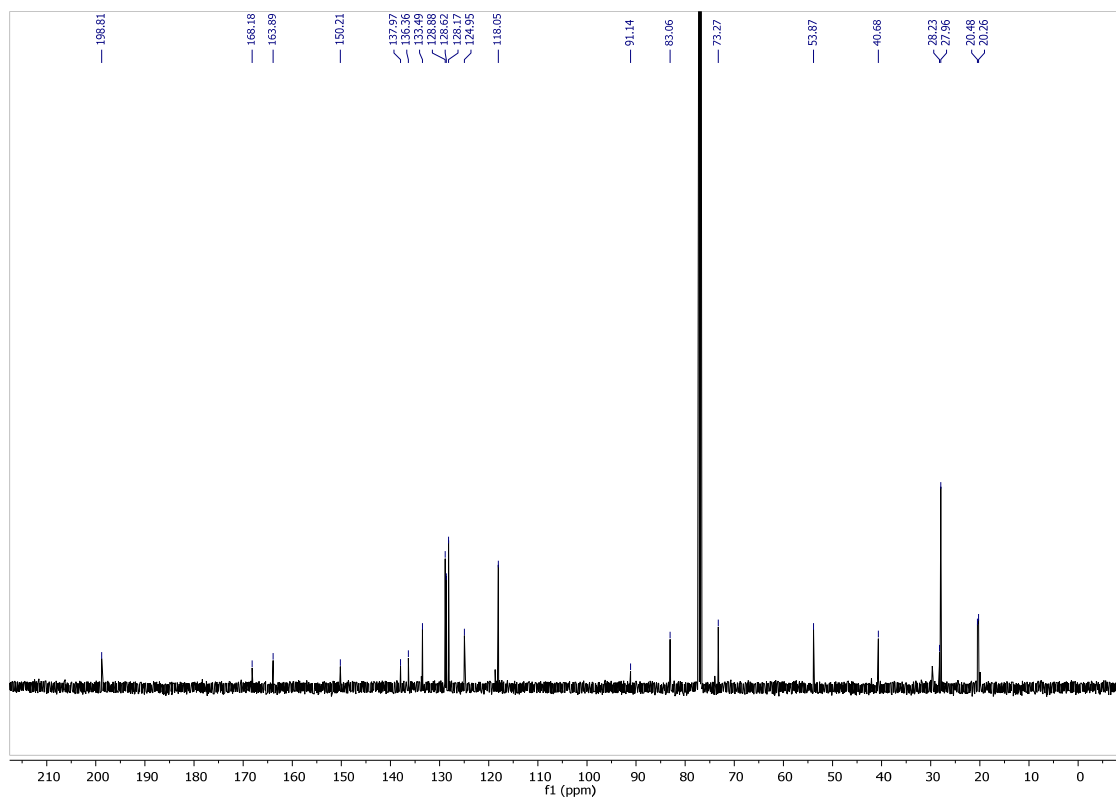

**tert-Butyl (3*R*,5*S*)-8-methyl-9-oxo-3-(2-oxo-2-phenylethyl)-6-phenyl-1-oxa-4,7,8-triazaspiro[4.4]non-6-ene-4-carboxylate (3fa).**

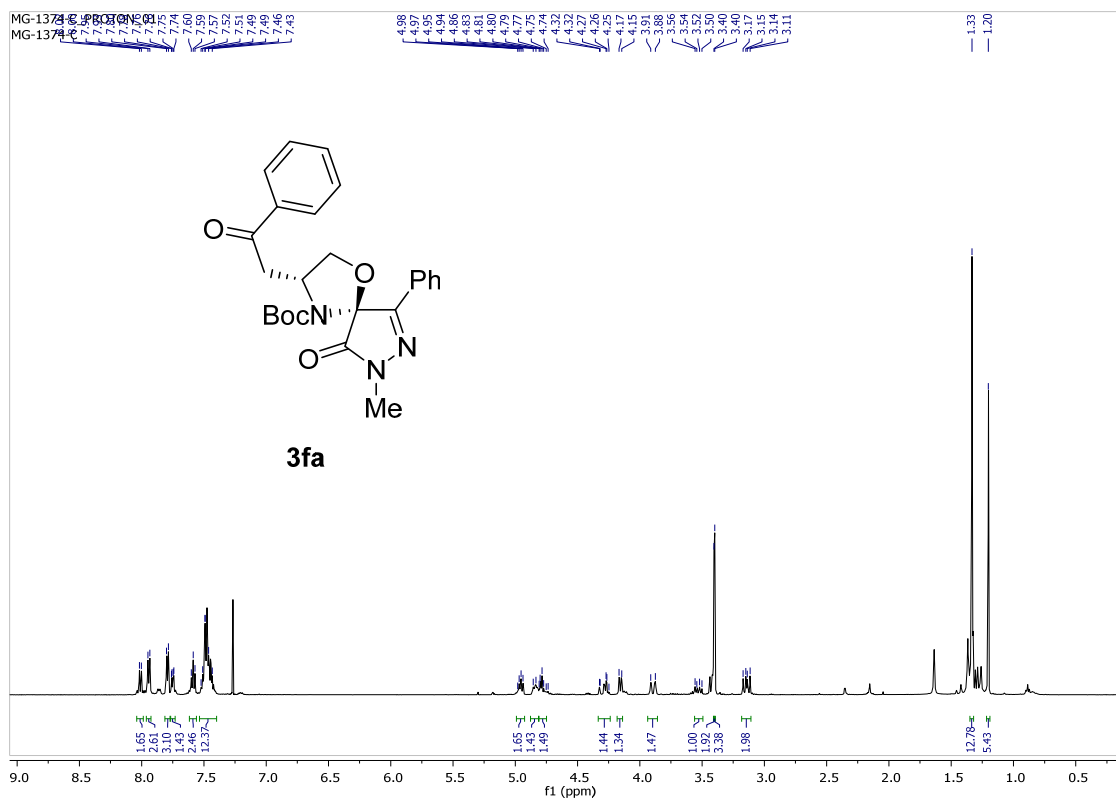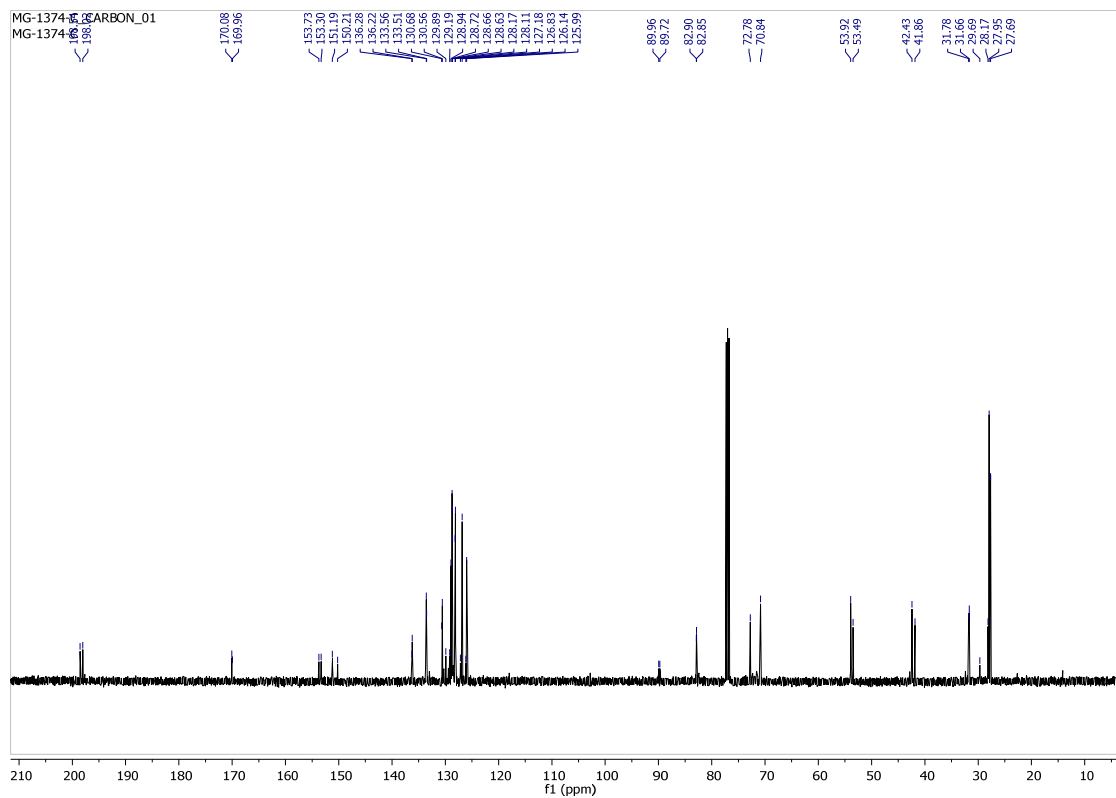

**tert-Butyl (3*R*,5*S*)-8-(4-chlorophenyl)-6-methyl-9-oxo-3-(2-oxo-2-phenylethyl)-1-oxa-4,7,8-triazaspiro[4.4]non-6-ene-4-carboxylate (3ga).**

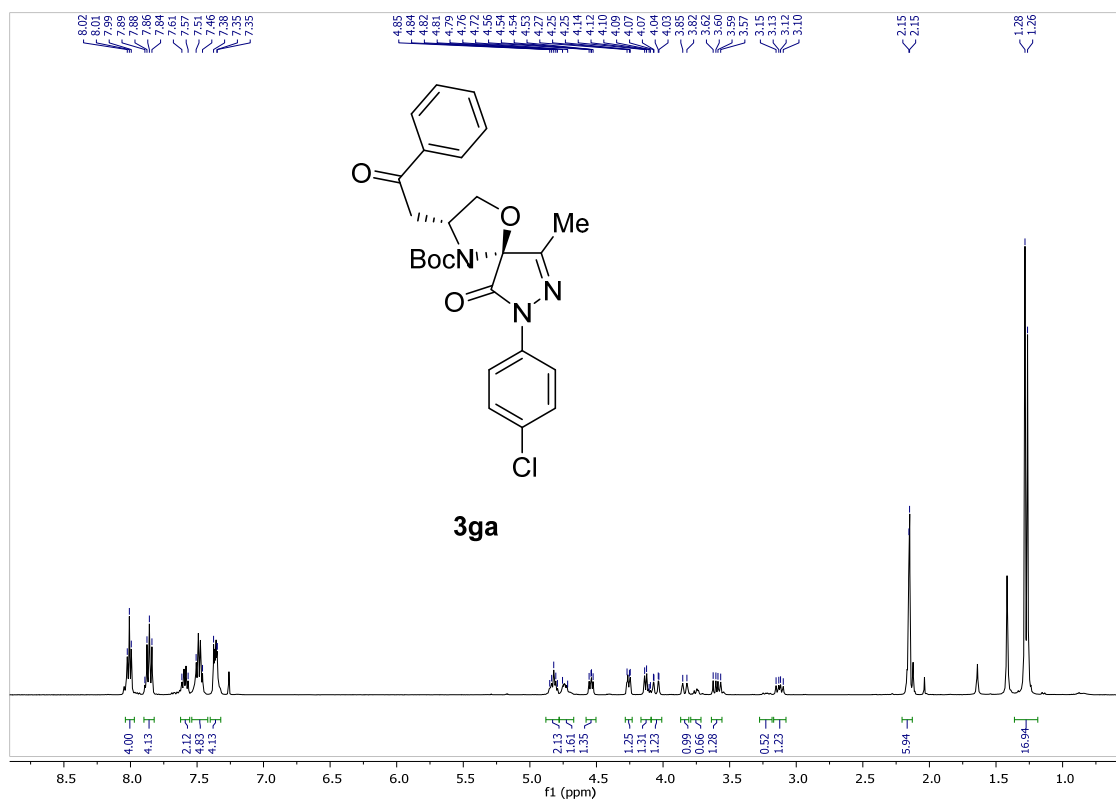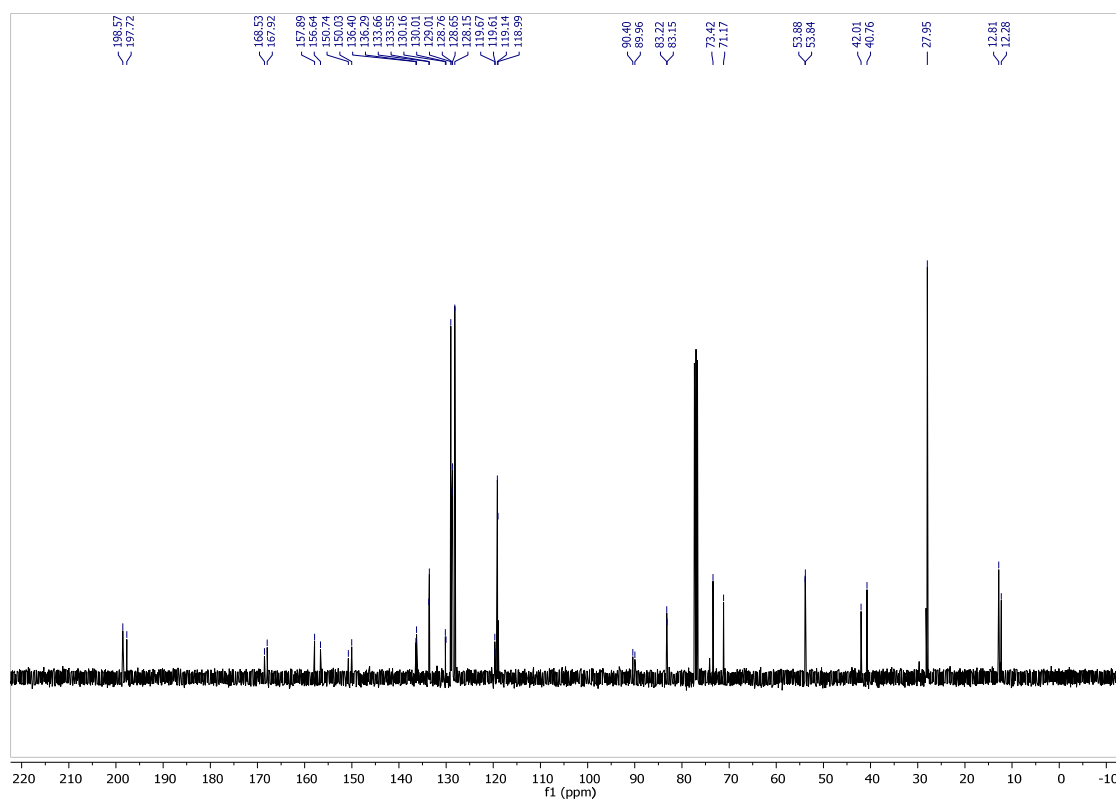

**tert-Butyl (3*R*,5*S*)-6-methyl-9-oxo-3-(2-oxo-2-phenylethyl)-8-(*p*-tolyl)-1-oxa-4,7,8-triazaspiro[4.4]non-6-ene-4-carboxylate (3ha).**

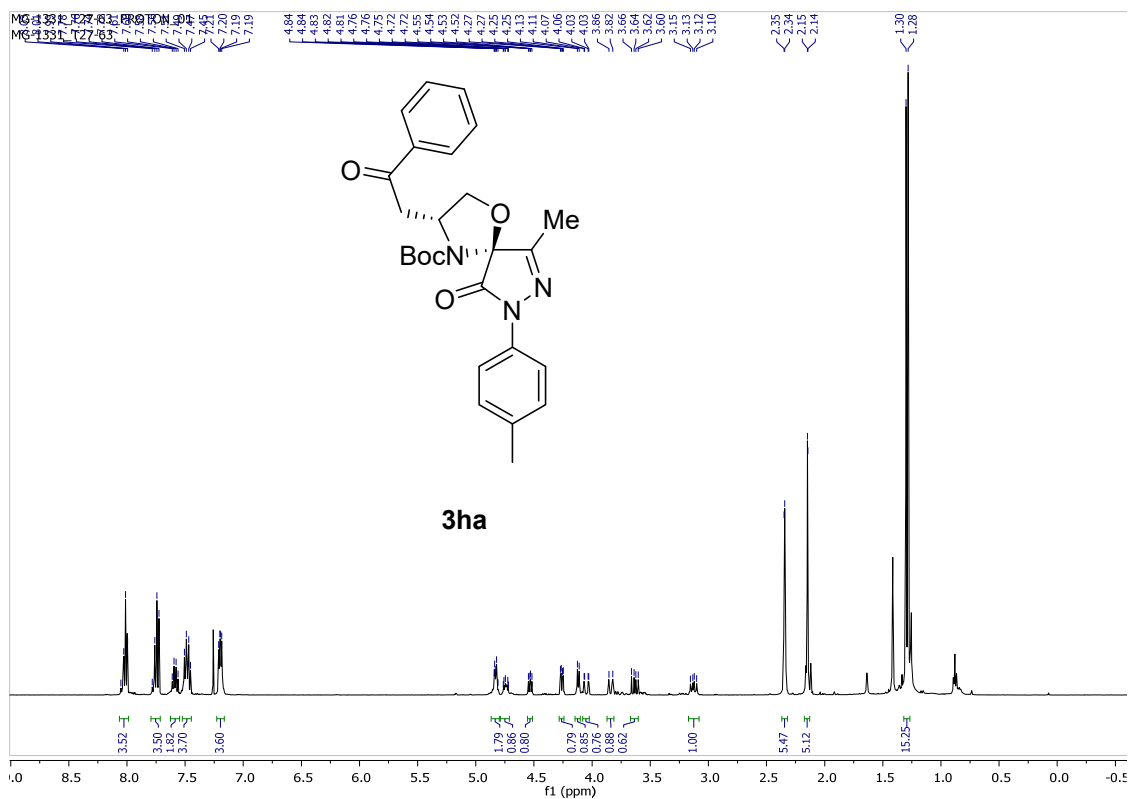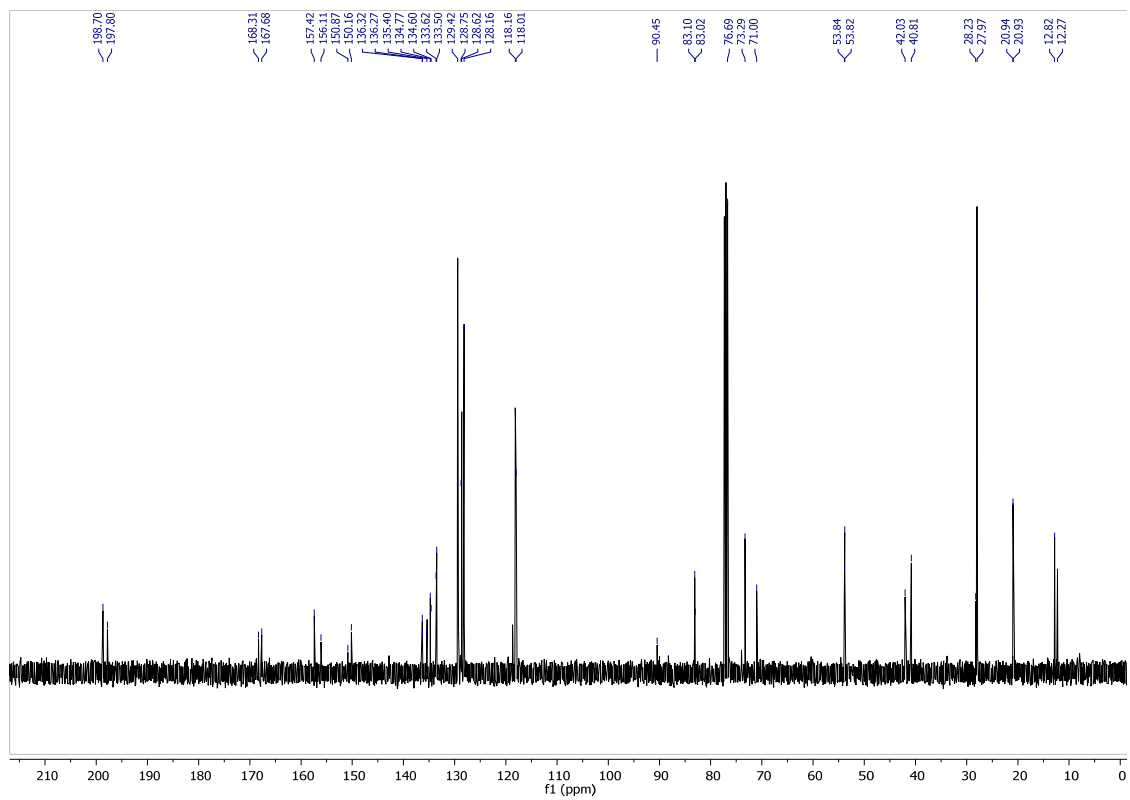

**tert-Butyl (3*R*,5*S*)-3-(2-([1,1'-biphenyl]-4-yl)-2-oxoethyl)-9-oxo-6,8-diphenyl-1-oxa-4,7,8-triazaspiro[4.4]non-6-ene-4-carboxylate (4).**

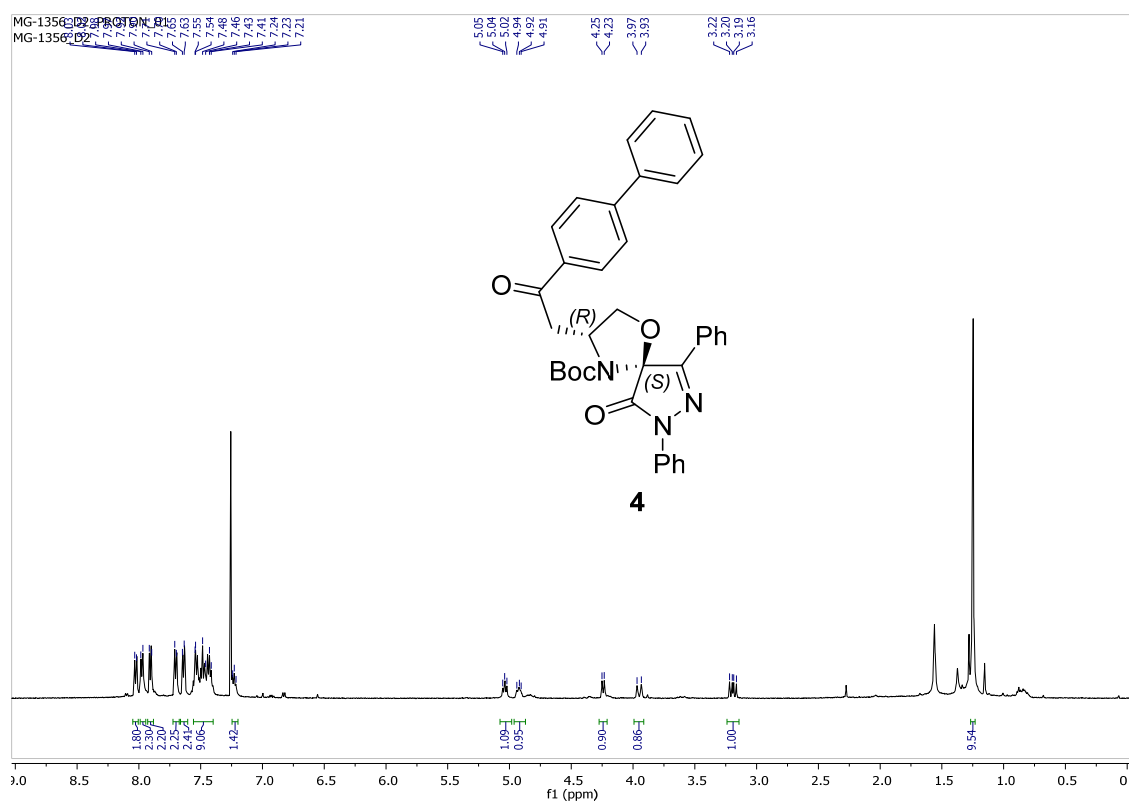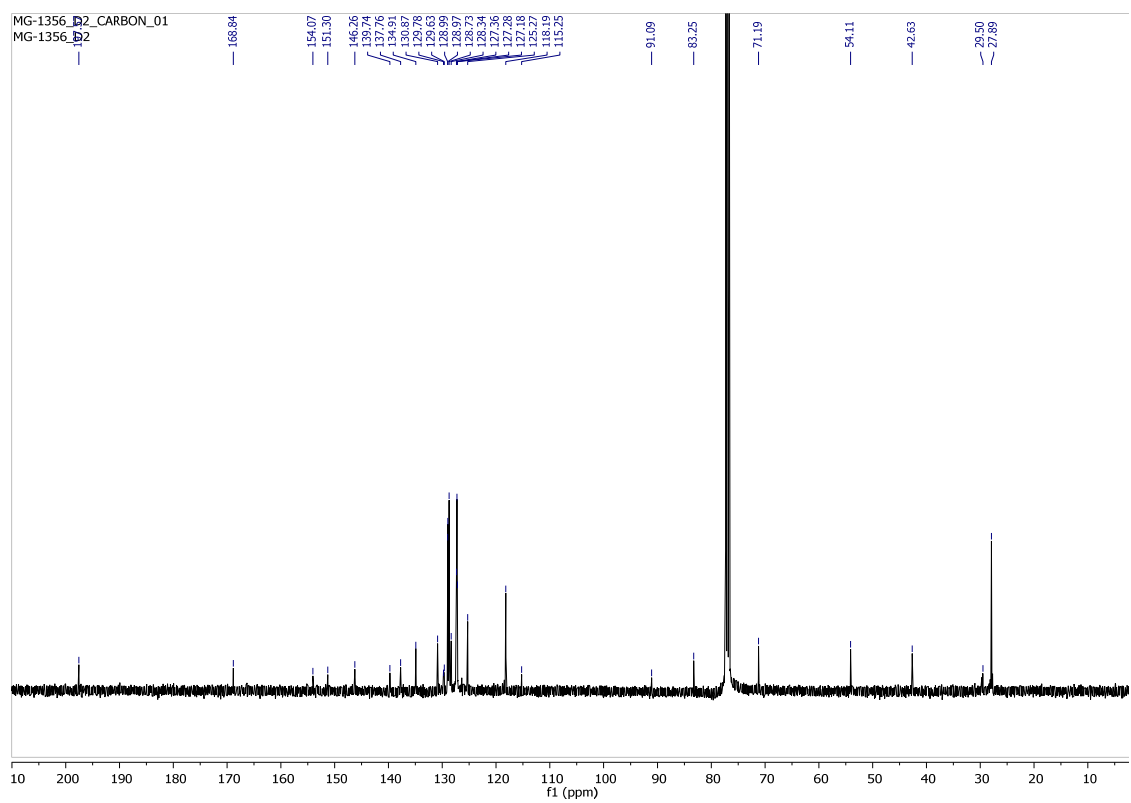

***tert*-Butyl (S)-(4-(allyloxy)-5-oxo-1,3-diphenyl-4,5-dihydro-1H-pyrazol-4-yl)carbamate**  
**(5).**

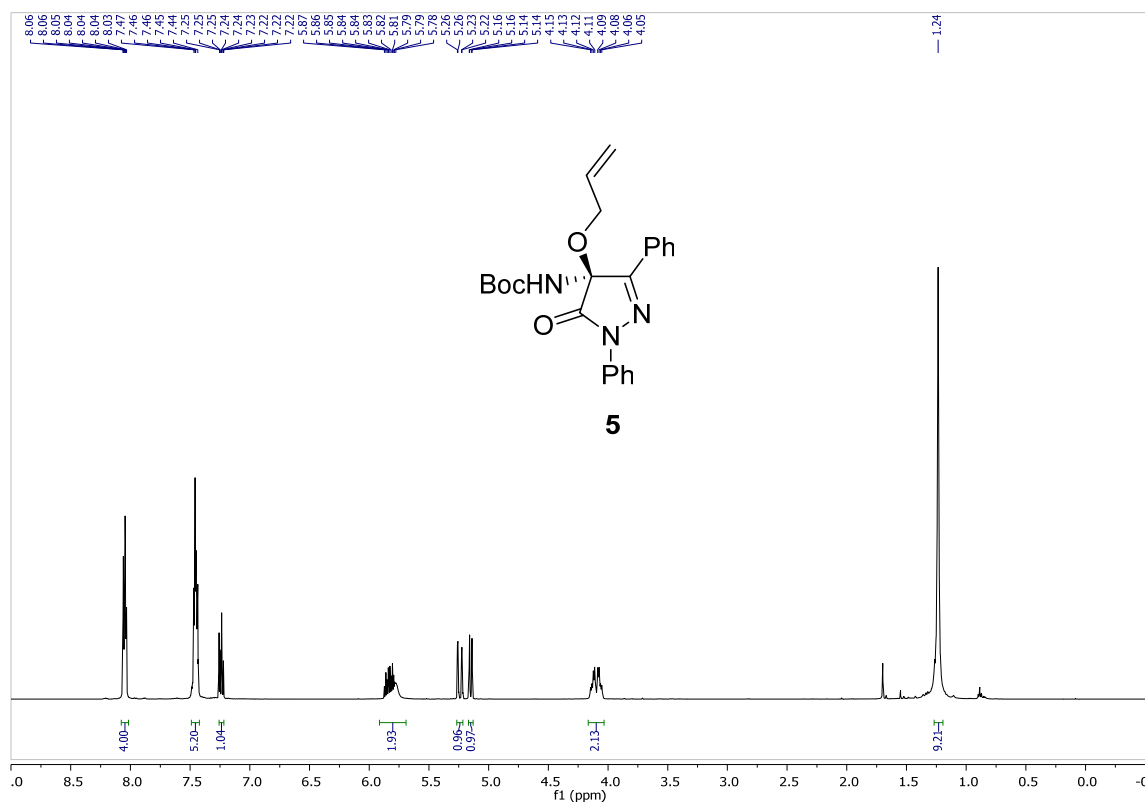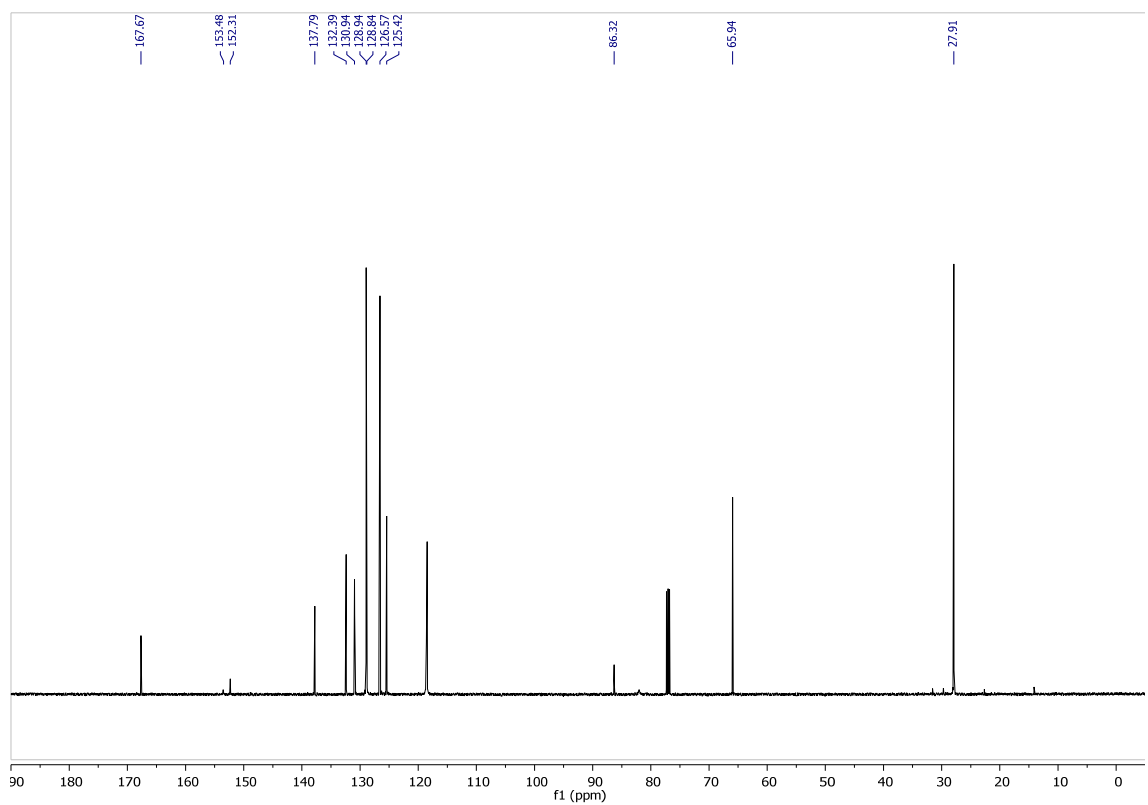



***tert*-Butyl (4-(allyloxy)-1-(4-chlorophenyl)-3-methyl-5-oxo-4,5-dihydro-1*H*-pyrazol-4-yl)carbamate (6).**

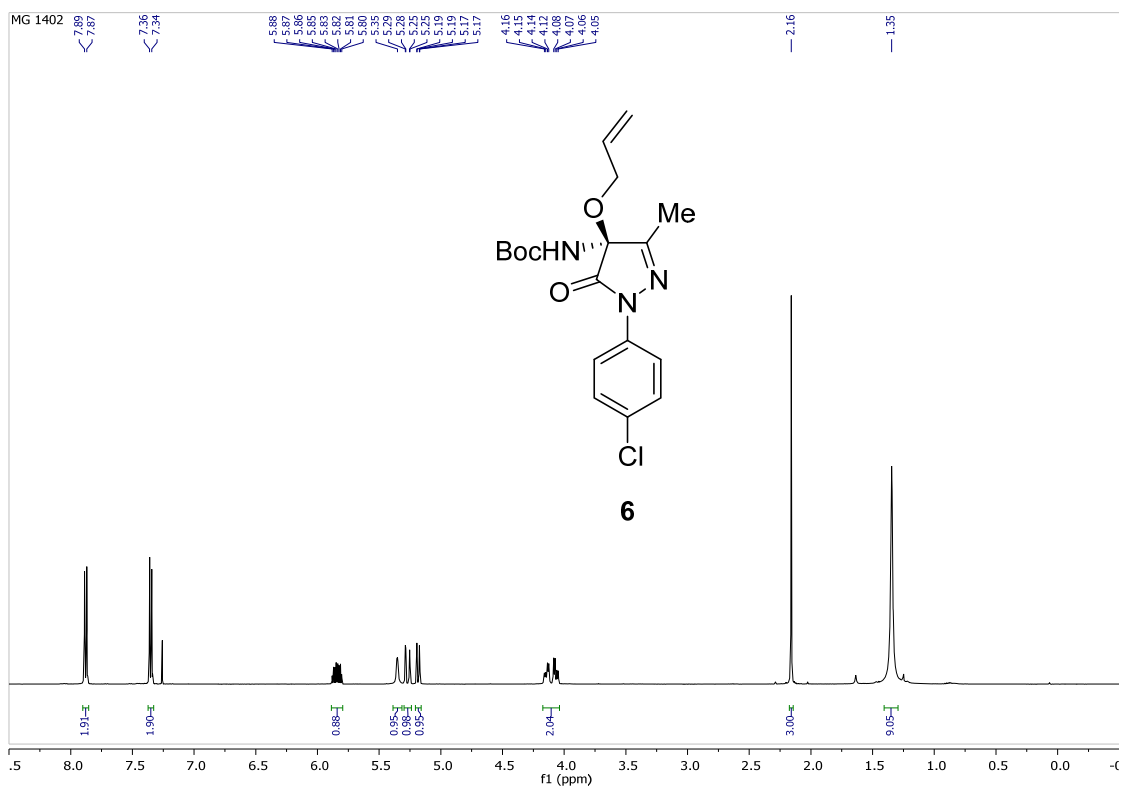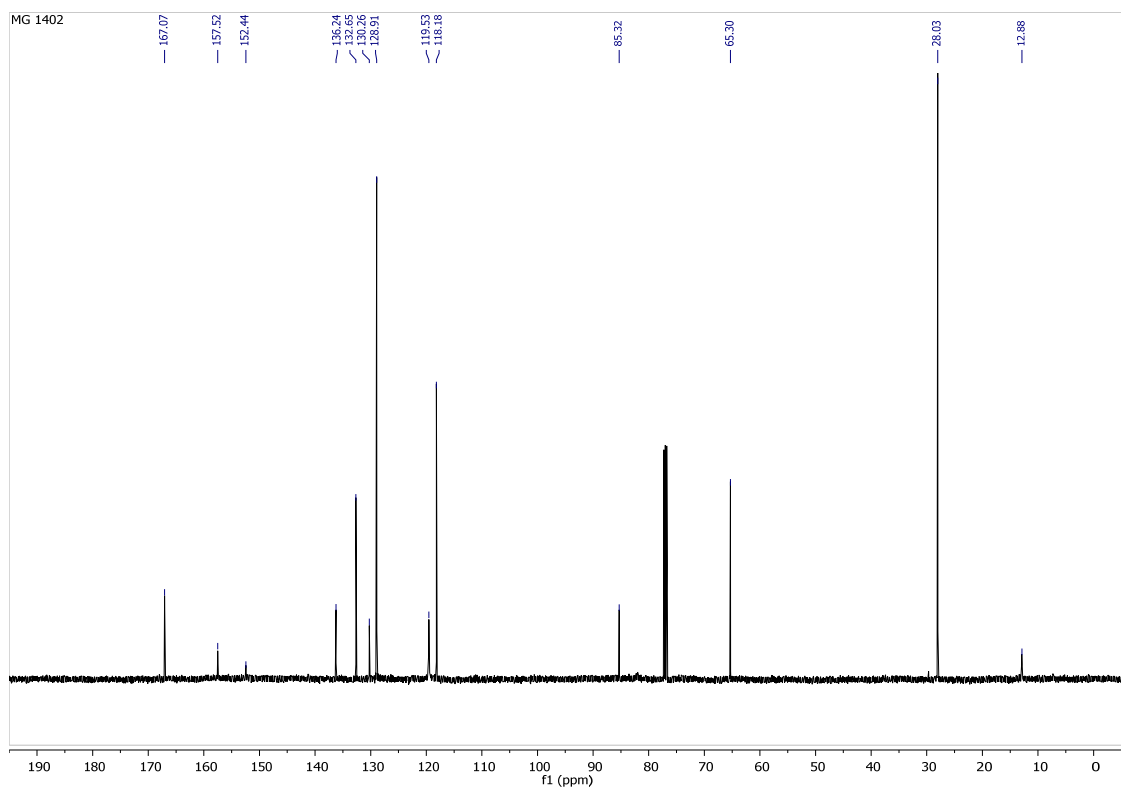

### 3. HPLC Profiles of the isolated compounds

*tert*-Butyl (3*R*,5*S*)-9-oxo-3-(2-oxo-2-phenylethyl)-6,8-diphenyl-1-oxa-4,7,8-triazaspiro[4.4]non-6-ene-4-carboxylate (**3aa**).

Major diastereomer (**3aa**).

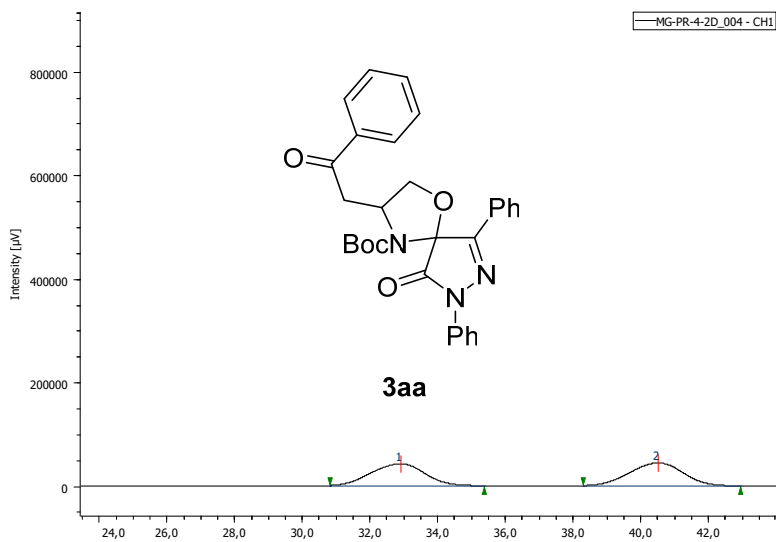

|   | t <sub>R</sub> | Area    | Area%  |
|---|----------------|---------|--------|
| 1 | 32,900         | 4647038 | 48,855 |
| 2 | 40,492         | 4864824 | 51,145 |

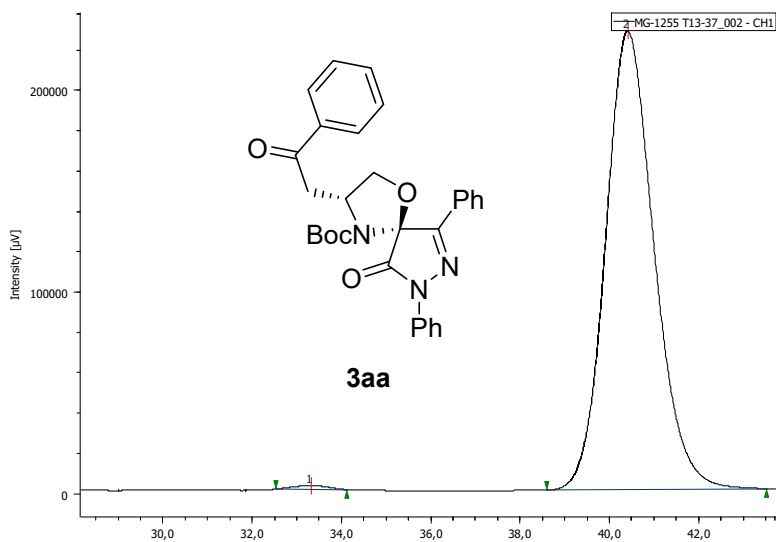

|   | t <sub>R</sub> | Area     | Area%  |
|---|----------------|----------|--------|
| 1 | 33,317         | 101705   | 0,591  |
| 2 | 40,392         | 17108197 | 99,409 |

### Minor diastereomer (*epi*-3aa)

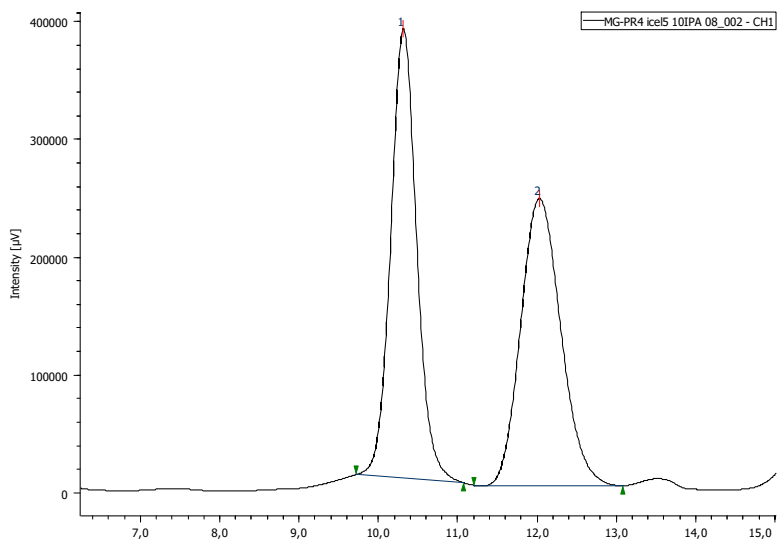

|   | <b>t<sub>R</sub></b> | <b>Area</b> | <b>Area%</b> |
|---|----------------------|-------------|--------------|
| 1 | 10,308               | 8644570     | 50,331       |
| 2 | 12,025               | 8530703     | 49,669       |

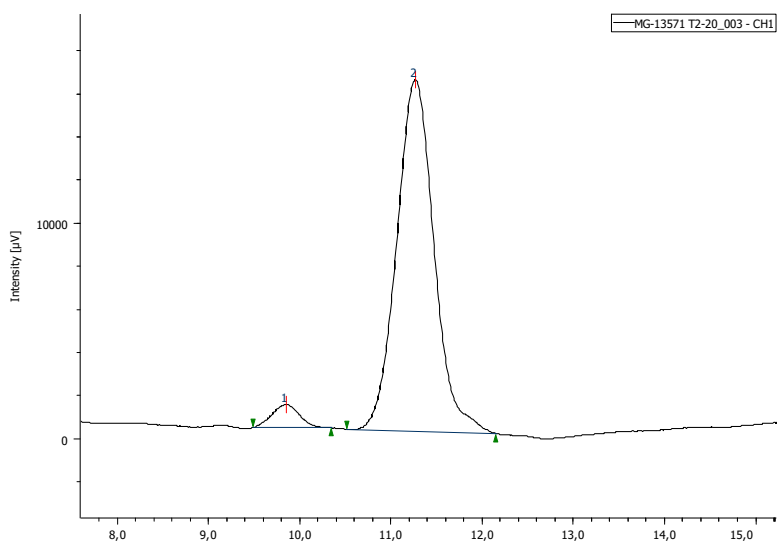

|   | <b>t<sub>R</sub></b> | <b>Area</b> | <b>Area%</b> |
|---|----------------------|-------------|--------------|
| 1 | 9,850                | 22699       | 4,678        |
| 2 | 11,267               | 462574      | 95,322       |

**tert-Butyl (3*R*,5*S*)-3-(2-(4-chlorophenyl)-2-oxoethyl)-9-oxo-6,8-diphenyl-1-oxa-4,7,8-triazaspiro[4.4]non-6-ene-4-carboxylate (3ab).**

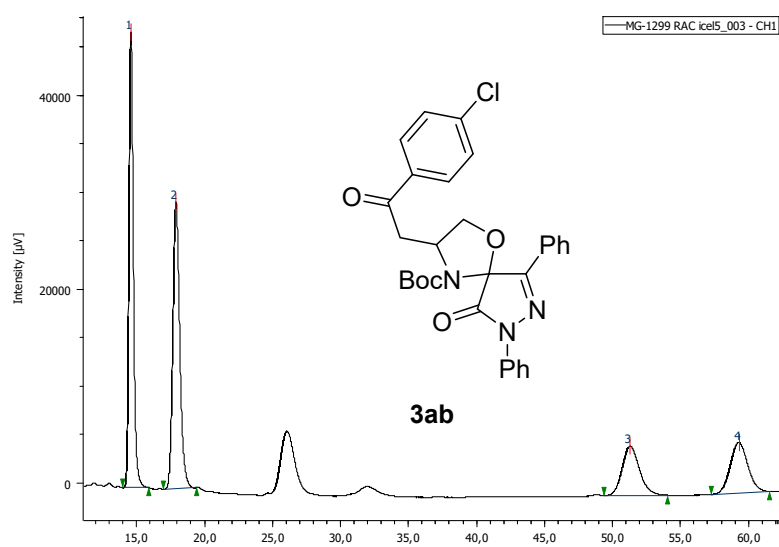

|   | $t_R$  | Area    | Area%         |
|---|--------|---------|---------------|
| 1 | 14,592 | 1066317 | <b>35,164</b> |
| 2 | 17,900 | 1051544 | <b>34,676</b> |
| 3 | 51,225 | 5066    | <b>14,813</b> |
| 4 | 59,233 | 5188    | <b>15,347</b> |

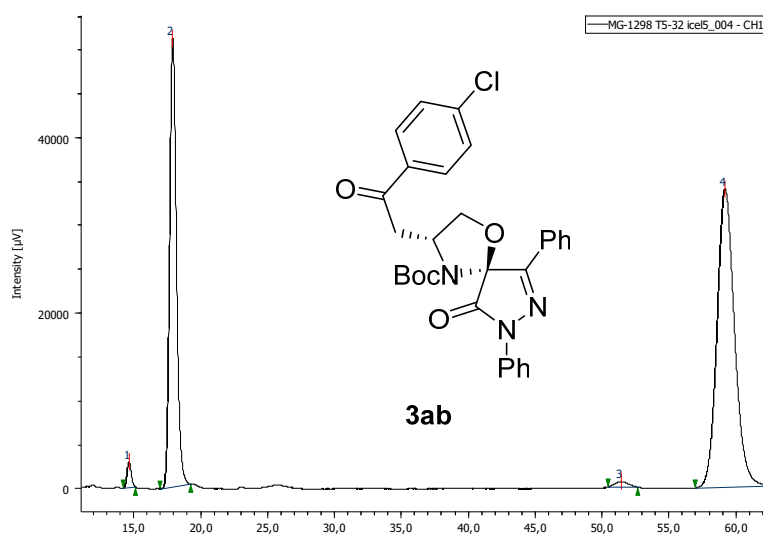

|   | $t_R$  | Area    | Area%         |
|---|--------|---------|---------------|
| 1 | 14,650 | 64643   | <b>1,298</b>  |
| 2 | 17,917 | 1771023 | <b>35,553</b> |
| 3 | 51,383 | 44616   | <b>0,896</b>  |
| 4 | 59,125 | 3101130 | <b>62,254</b> |

### Racemate of major diastereomer

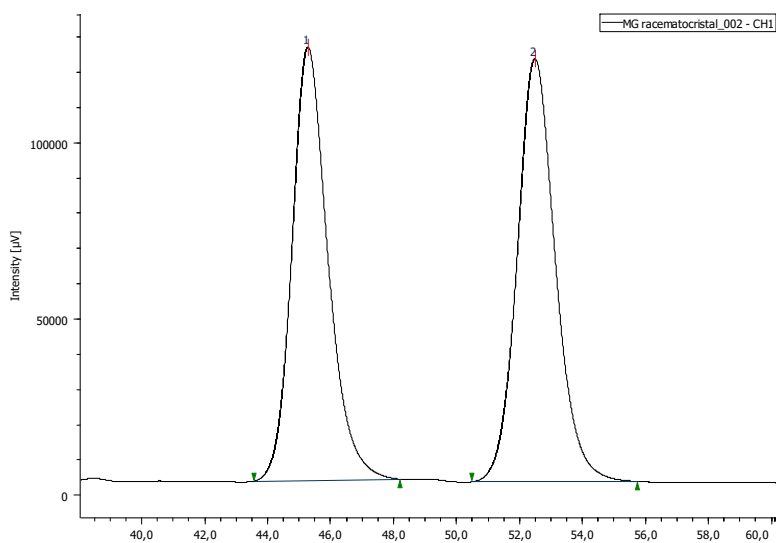

|   | <b>t<sub>R</sub></b> | <b>Area</b> | <b>Area%</b>  |
|---|----------------------|-------------|---------------|
| 1 | 45,275               | 9734923     | <b>49,109</b> |
| 2 | 52,475               | 10088078    | <b>50,891</b> |

### HPLC profile of enantioenriched 3ab after slow evaporation from hexane-chloroform

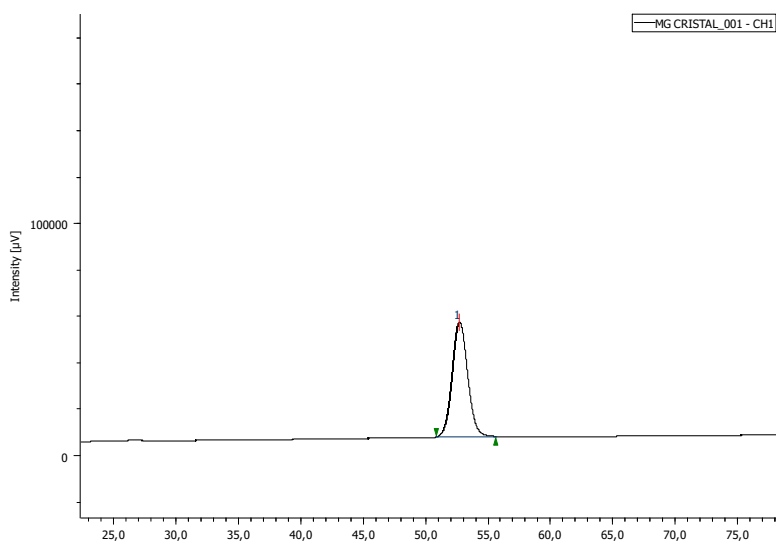

|   | <b>t<sub>R</sub></b> | <b>Area</b> | <b>Area%</b>   |
|---|----------------------|-------------|----------------|
| 1 | 52,692               | 4248576     | <b>100,000</b> |

The HPLC of the enantioenriched compound **3ab** was taken and we observed only one peak corresponding to the major diastereomer; there was no peak corresponding to the minor diastereomer.

**tert-Butyl (3R,5S)-3-(2-(4-bromophenyl)-2-oxoethyl)-9-oxo-6,8-diphenyl-1-oxa-4,7,8-triazaspiro[4.4]non-6-ene-4-carboxylate (3ac).**

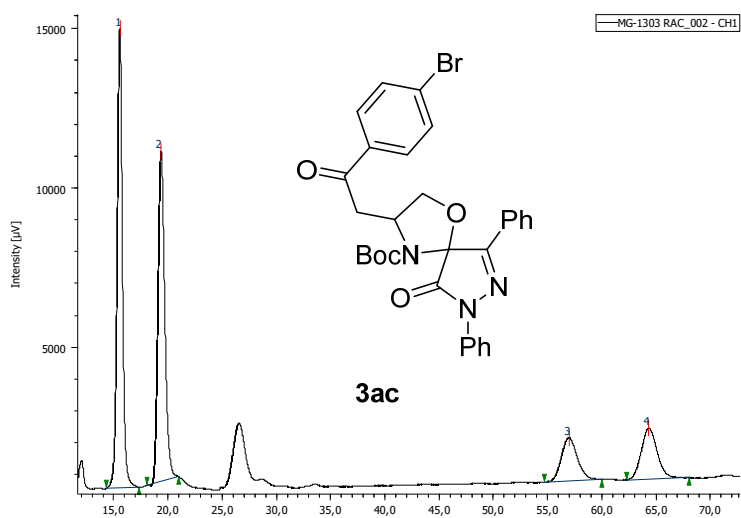

|   | <b>t<sub>R</sub></b> | <b>Area</b> | <b>Area%</b>  |
|---|----------------------|-------------|---------------|
| 1 | 15,558               | 474243      | <b>38,645</b> |
| 2 | 19,358               | 450410      | <b>36,703</b> |
| 3 | 56,908               | 139145      | <b>11,339</b> |
| 4 | 64,275               | 163364      | <b>13,312</b> |

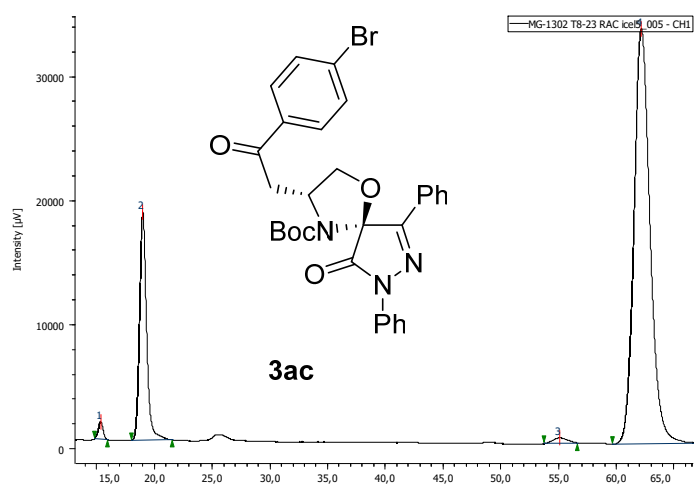

|   | <b>t<sub>R</sub></b> | <b>Area</b> | <b>Area%</b>  |
|---|----------------------|-------------|---------------|
| 1 | 15,350               | 39771       | <b>0,977</b>  |
| 2 | 18,983               | 781687      | <b>19,194</b> |
| 3 | 55,033               | 36612       | <b>0,899</b>  |
| 4 | 62,100               | 3214477     | <b>78,930</b> |

**tert-Butyl (3R,5S)-9-oxo-3-(2-oxo-2-(p-tolyl)ethyl)-6,8-diphenyl-1-oxa-4,7,8-triazaspiro[4.4]non-6-ene-4-carboxylate (3ad).**

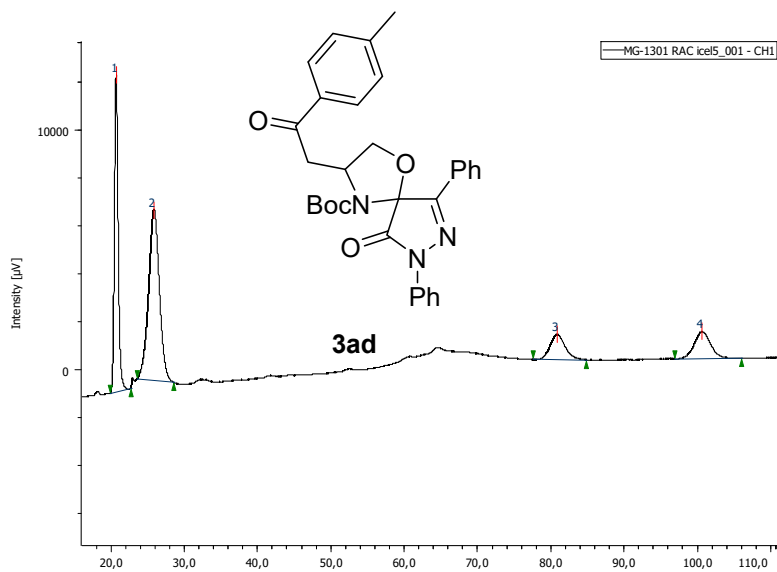

|   | t <sub>R</sub> | Area   | Area%         |
|---|----------------|--------|---------------|
| 1 | 20,717         | 456578 | <b>29,945</b> |
| 2 | 25,908         | 738291 | <b>48,421</b> |
| 3 | 80,725         | 151879 | <b>9,961</b>  |
| 4 | 100,483        | 177993 | <b>11,674</b> |

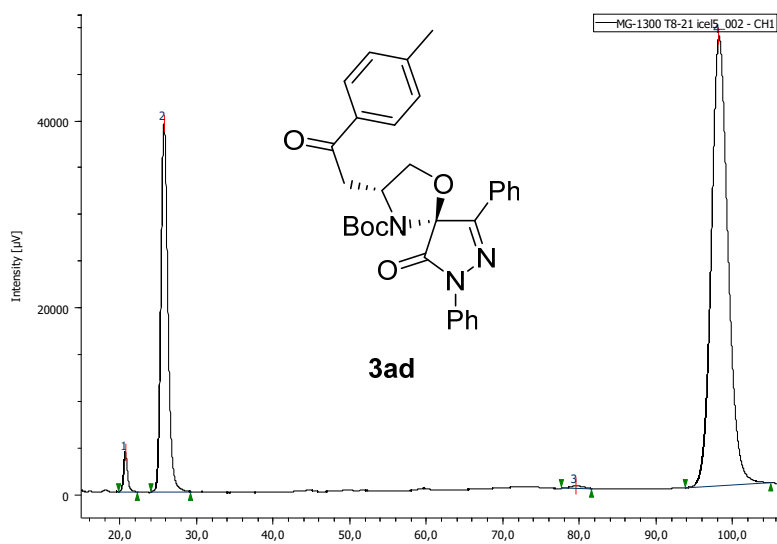

|   | t <sub>R</sub> | Area    | Area%         |
|---|----------------|---------|---------------|
| 1 | 20,692         | 153178  | <b>1,556</b>  |
| 2 | 25,750         | 2452693 | <b>24,922</b> |
| 3 | 79,500         | 31259   | <b>0,318</b>  |
| 4 | 98,117         | 7204454 | <b>73,204</b> |

**tert-Butyl (3*R*,5*S*)-3-(2-(4-methoxyphenyl)-2-oxoethyl)-9-oxo-6,8-diphenyl-1-oxa-4,7,8-triazaspiro[4.4]non-6-ene-4-carboxylate (3ae).**

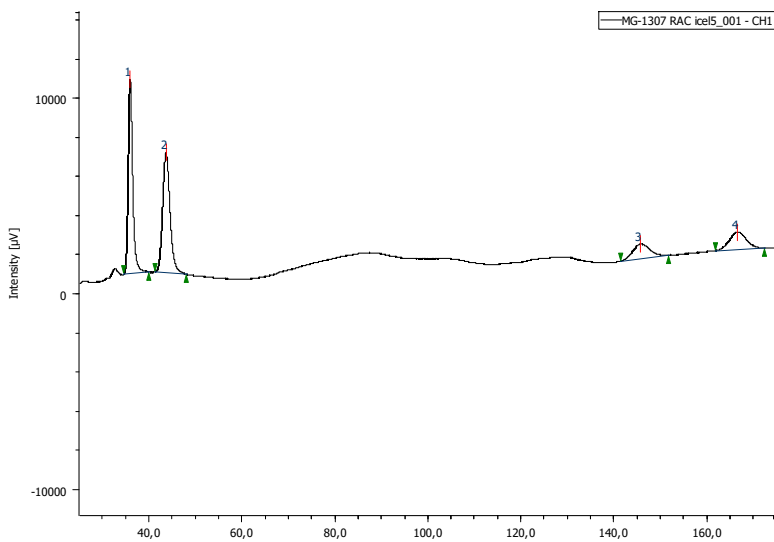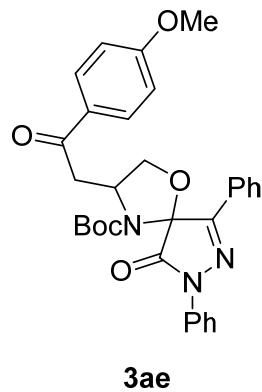

|   | <b>t<sub>R</sub></b> | <b>Area</b> | <b>Area%</b>  |
|---|----------------------|-------------|---------------|
| 1 | 35,983               | 667316      | <b>38,121</b> |
| 2 | 43,700               | 667153      | <b>38,111</b> |
| 3 | 145,575              | 190218      | <b>10,866</b> |
| 4 | 166,467              | 225846      | <b>12,902</b> |

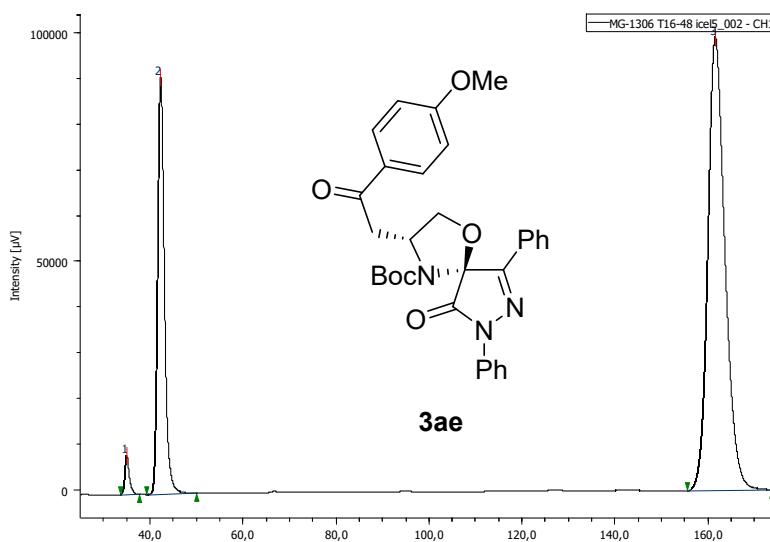

|   | <b>t<sub>R</sub></b> | <b>Area</b> | <b>Area%</b>  |
|---|----------------------|-------------|---------------|
| 1 | 35,008               | 579064      | <b>1,661</b>  |
| 2 | 42,300               | 9052756     | <b>25,960</b> |
| 3 | 161,517              | 25240037    | <b>72,379</b> |



**tert-Butyl (3*R*,5*S*)-6-methyl-9-oxo-3-(2-oxo-2-phenylethyl)-8-phenyl-1-oxa-4,7,8-triazaspiro[4.4]non-6-ene-4-carboxylate (3ba).**

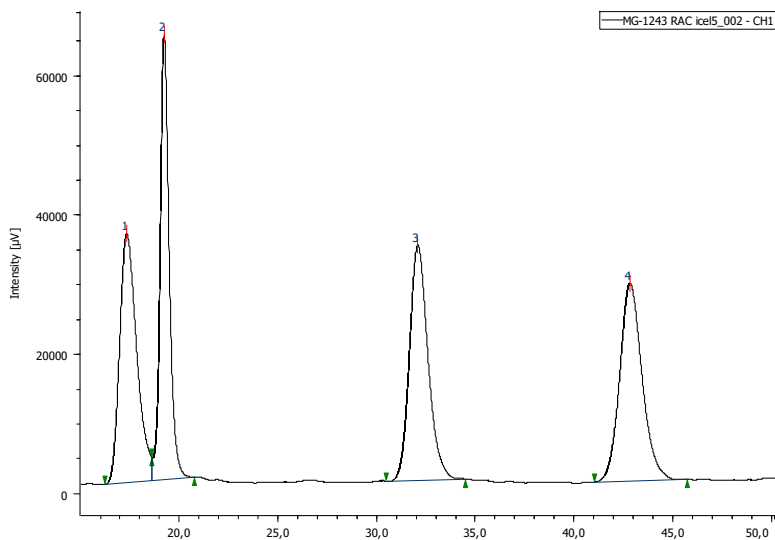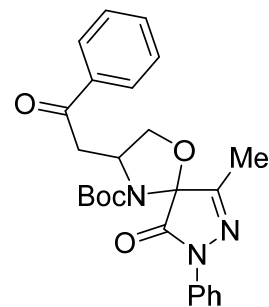

**3ba**

|   | <b>t<sub>R</sub></b> | <b>Area</b> | <b>Area%</b>  |
|---|----------------------|-------------|---------------|
| 1 | 17,342               | 2142035     | <b>24,941</b> |
| 2 | 19,233               | 2024575     | <b>23,573</b> |
| 3 | 32,067               | 2187954     | <b>25,475</b> |
| 4 | 42,800               | 2233929     | <b>26,011</b> |

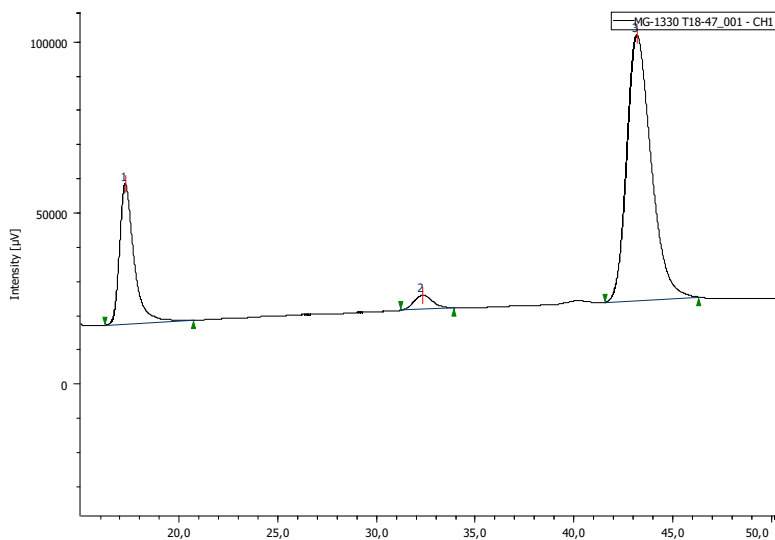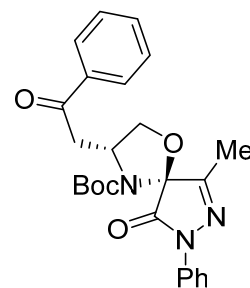

**3ba**

|   | <b>t<sub>R</sub></b> | <b>Area</b> | <b>Area%</b>  |
|---|----------------------|-------------|---------------|
| 1 | 17,267               | 2072948     | <b>23,024</b> |
| 2 | 32,308               | 266764      | <b>2,963</b>  |
| 3 | 43,158               | 6663575     | <b>74,013</b> |

**tert-Butyl (3R,5S)-6-ethyl-9-oxo-3-(2-oxo-2-phenylethyl)-8-phenyl-1-oxa-4,7,8-triazaspiro[4.4]non-6-ene-4-carboxylate (3ca).**

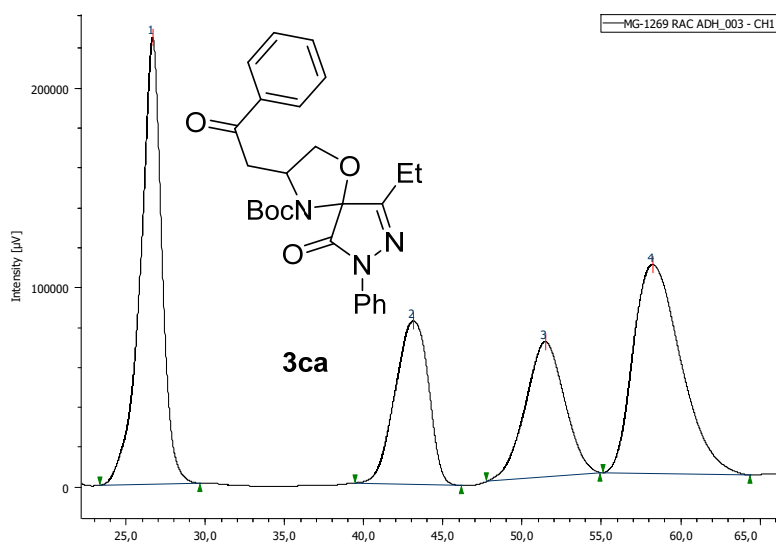

|   | t <sub>R</sub> | Area     | Area%         |
|---|----------------|----------|---------------|
| 1 | 26,658         | 21163714 | <b>31,754</b> |
| 2 | 43,083         | 12019288 | <b>18,034</b> |
| 3 | 51,408         | 11610308 | <b>17,420</b> |
| 4 | 58,175         | 21856462 | <b>32,793</b> |

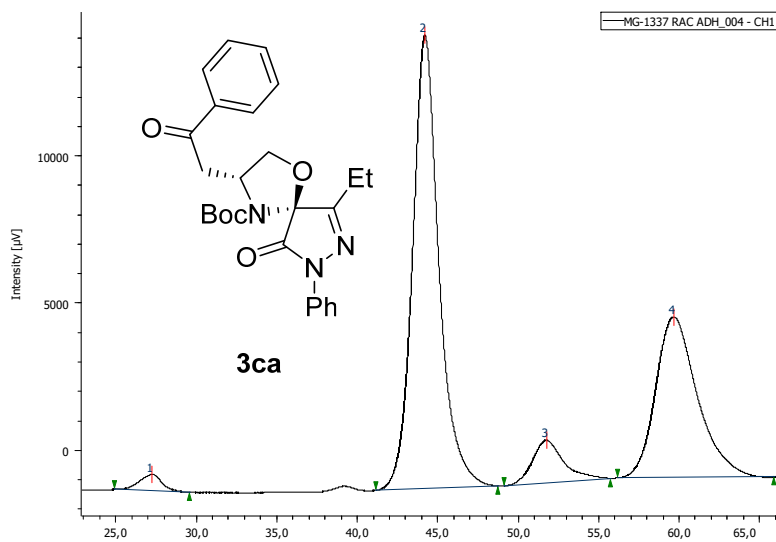

|   | t <sub>R</sub> | Area    | Area%         |
|---|----------------|---------|---------------|
| 1 | 27,242         | 54712   | <b>1,836</b>  |
| 2 | 44,167         | 1750389 | <b>58,744</b> |
| 3 | 51,708         | 194718  | <b>6,535</b>  |
| 4 | 59,600         | 979858  | <b>32,885</b> |

**tert-Butyl (3*R*,5*S*)-6-isopropyl-9-oxo-3-(2-oxo-2-phenylethyl)-8-phenyl-1-oxa-4,7,8-triazaspiro[4.4]non-6-ene-4-carboxylate (3da).**

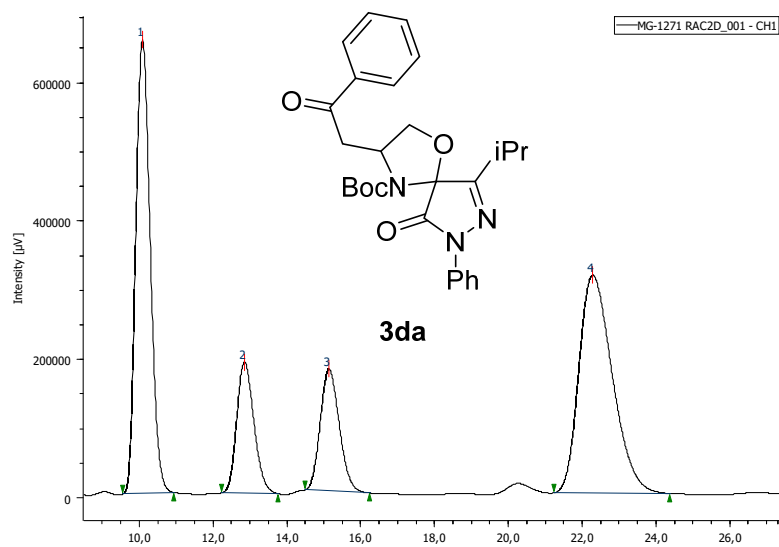

|   | <b>t<sub>R</sub></b> | <b>Area</b> | <b>Area%</b>  |
|---|----------------------|-------------|---------------|
| 1 | 10,083               | 17728052    | <b>35,509</b> |
| 2 | 12,850               | 6111564     | <b>12,241</b> |
| 3 | 15,133               | 6299936     | <b>12,619</b> |
| 4 | 22,275               | 19785865    | <b>39,631</b> |

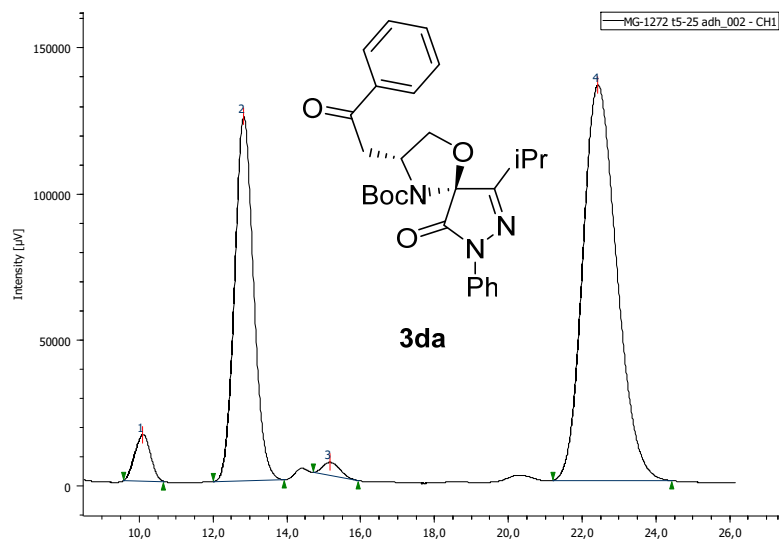

|   | <b>t<sub>R</sub></b> | <b>Area</b> | <b>Area%</b>  |
|---|----------------------|-------------|---------------|
| 1 | 10,100               | 334307      | <b>2,454</b>  |
| 2 | 12,825               | 4449899     | <b>32,665</b> |
| 3 | 15,158               | 146499      | <b>1,075</b>  |
| 4 | 22,408               | 8692319     | <b>63,806</b> |

Major diastereomer.

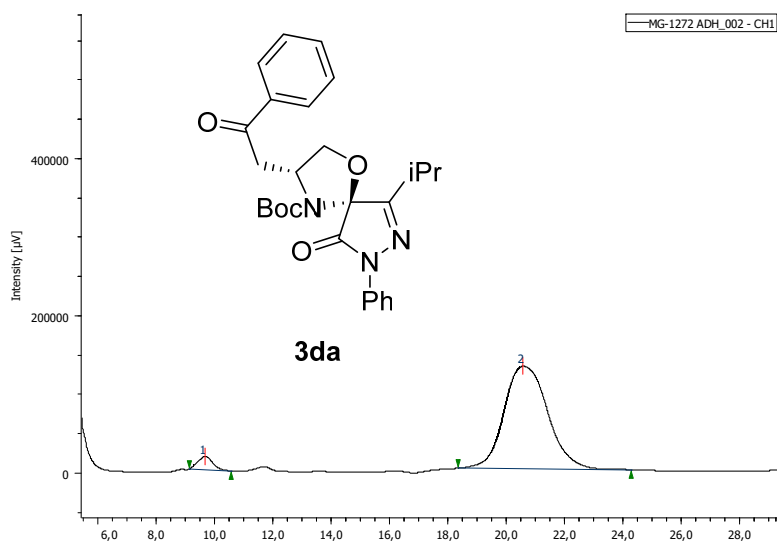

|   | <b>t<sub>R</sub></b> | <b>Area</b> | <b>Area%</b>  |
|---|----------------------|-------------|---------------|
| 1 | 9,675                | 504356      | <b>3,889</b>  |
| 2 | 20,558               | 12465696    | <b>96,111</b> |

**tert-Butyl (3*R*,5*S*)-8-methyl-9-oxo-3-(2-oxo-2-phenylethyl)-6-phenyl-1-oxa-4,7,8-triazaspiro[4.4]non-6-ene-4-carboxylate (3fa).**

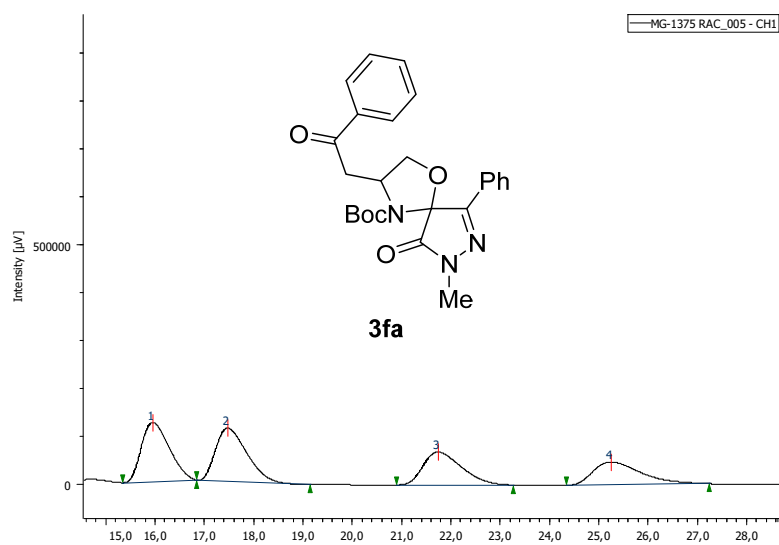

| Entry | t <sub>R</sub> | Area    | Area%         |
|-------|----------------|---------|---------------|
| 1     | 15,950         | 4847726 | <b>29,039</b> |
| 2     | 17,467         | 4866248 | <b>29,150</b> |
| 3     | 21,733         | 3724278 | <b>22,309</b> |
| 4     | 25,242         | 3255710 | <b>19,502</b> |

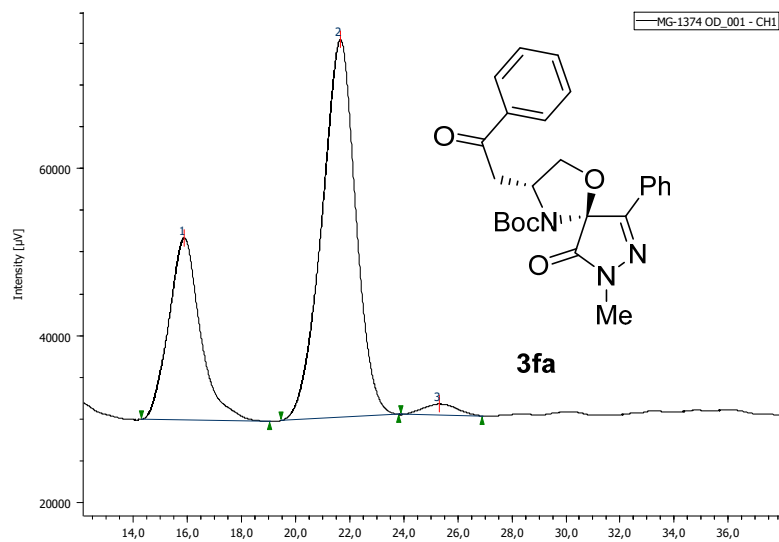

|   | t <sub>R</sub> | Area    | Area%         |
|---|----------------|---------|---------------|
| 1 | 15,875         | 1770022 | <b>30,460</b> |
| 2 | 21,650         | 3921811 | <b>67,490</b> |
| 3 | 25,300         | 119147  | <b>2,050</b>  |

**tert-Butyl (3*R*,5*S*)-8-(4-chlorophenyl)-6-methyl-9-oxo-3-(2-oxo-2-phenylethyl)-1-oxa-4,7,8-triazaspiro[4.4]non-6-ene-4-carboxylate (3ga).**

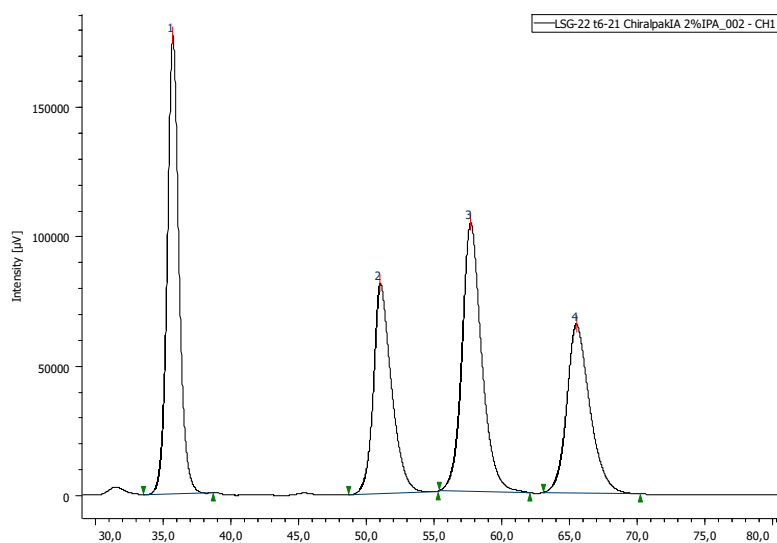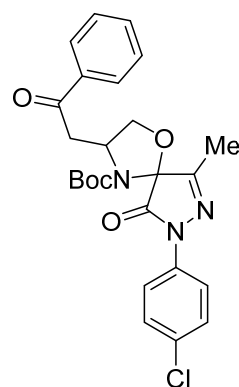

**3ga**

|   | <b>t<sub>R</sub></b> | <b>Area</b> | <b>Area%</b>  |
|---|----------------------|-------------|---------------|
| 1 | 35,683               | 10564747    | <b>29,214</b> |
| 2 | 50,975               | 7496291     | <b>20,729</b> |
| 3 | 57,642               | 10426712    | <b>28,833</b> |
| 4 | 65,442               | 7675119     | <b>21,224</b> |

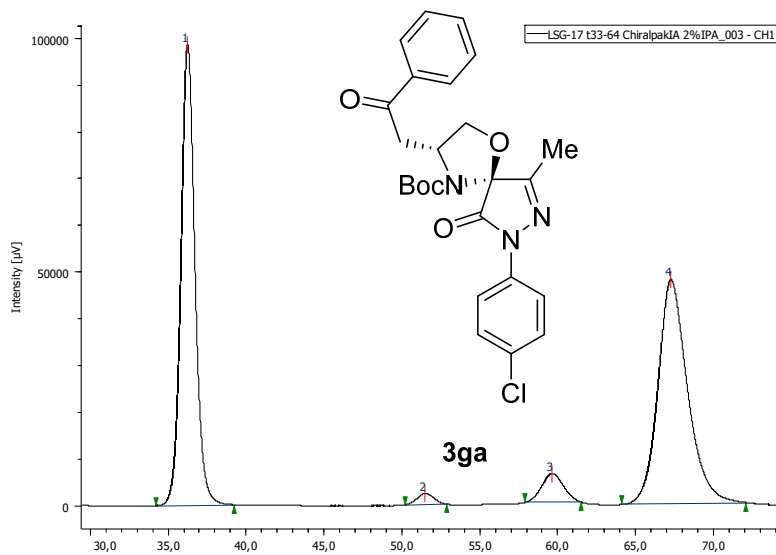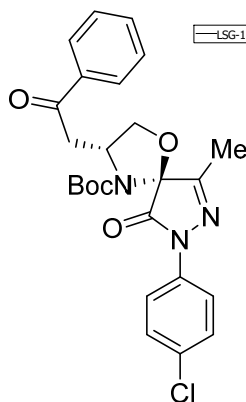

**3ga**

|   | <b>t<sub>R</sub></b> | <b>Area</b> | <b>Area%</b>  |
|---|----------------------|-------------|---------------|
| 1 | 36,250               | 6141275     | <b>46,509</b> |
| 2 | 51,467               | 176686      | <b>1,338</b>  |
| 3 | 59,592               | 600392      | <b>4,547</b>  |
| 4 | 67,208               | 6286030     | <b>47,606</b> |

**tert-Butyl (3R,5S)-6-methyl-9-oxo-3-(2-oxo-2-phenylethyl)-8-(p-tolyl)-1-oxa-4,7,8-triazaspiro[4.4]non-6-ene-4-carboxylate (3ha).**

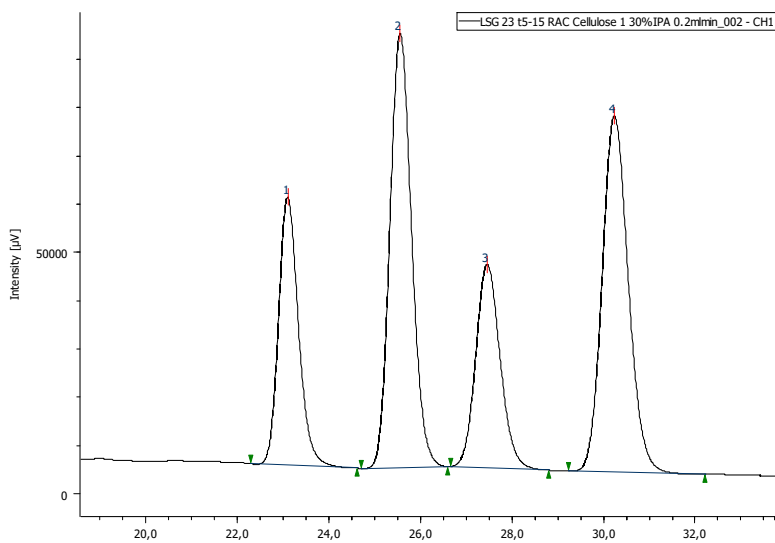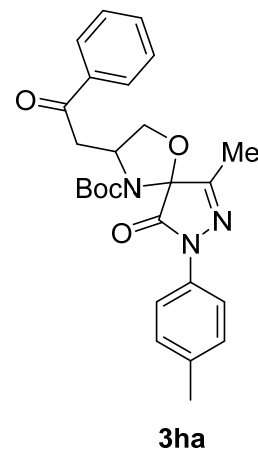

|   | <b>t<sub>R</sub></b> | <b>Area</b> | <b>Area%</b>  |
|---|----------------------|-------------|---------------|
| 1 | 23,092               | 1679660     | <b>18,431</b> |
| 2 | 25,542               | 2940943     | <b>32,272</b> |
| 3 | 27,442               | 1563701     | <b>17,159</b> |
| 4 | 30,217               | 2928780     | <b>32,138</b> |

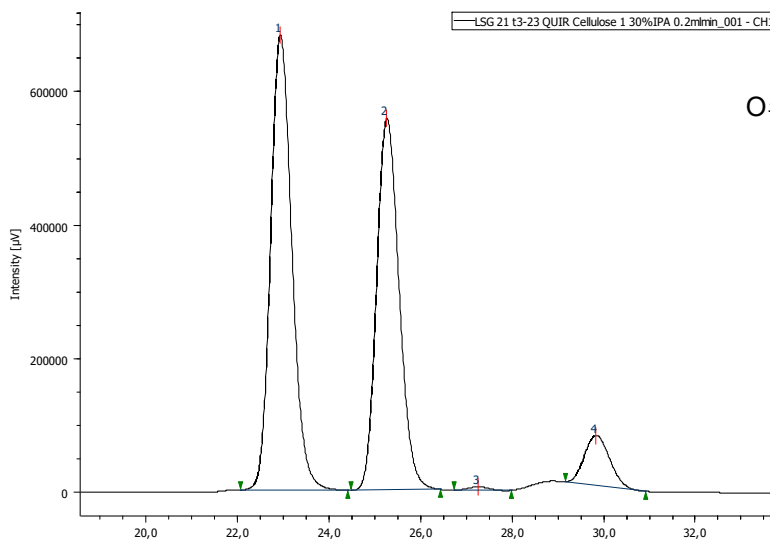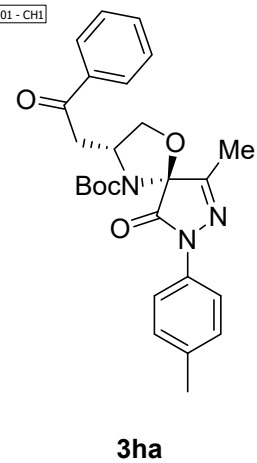

|   | <b>t<sub>R</sub></b> | <b>Area</b> | <b>Area%</b>  |
|---|----------------------|-------------|---------------|
| 1 | 22,925               | 21992085    | <b>50,080</b> |
| 2 | 25,250               | 18917536    | <b>43,078</b> |
| 3 | 27,242               | 153703      | <b>0,350</b>  |
| 4 | 29,817               | 2850989     | <b>6,492</b>  |

**tert-Butyl (3R,5S)-3-(2-([1,1'-biphenyl]-4-yl)-2-oxoethyl)-9-oxo-6,8-diphenyl-1-oxa-4,7,8-triazaspiro[4.4]non-6-ene-4-carboxylate (4).**

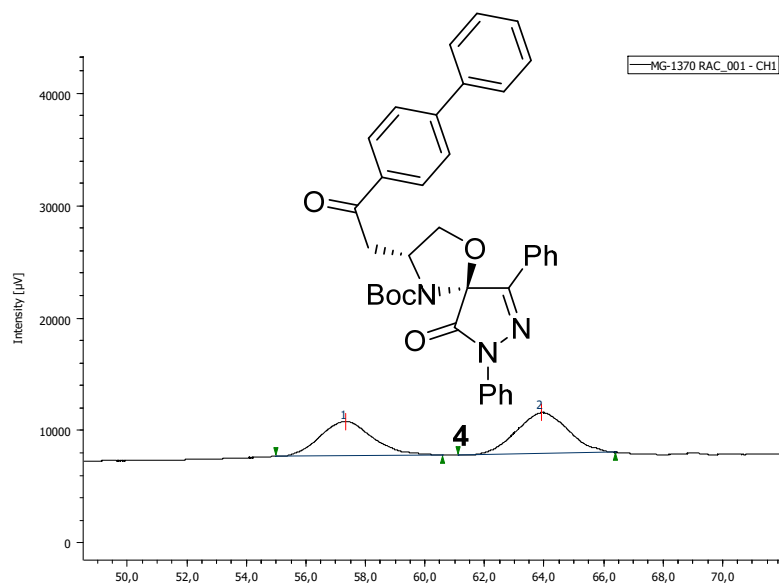

|   | $t_R$  | Area   | Area%  |
|---|--------|--------|--------|
| 1 | 57,333 | 379367 | 46,504 |
| 2 | 63,908 | 436401 | 53,496 |

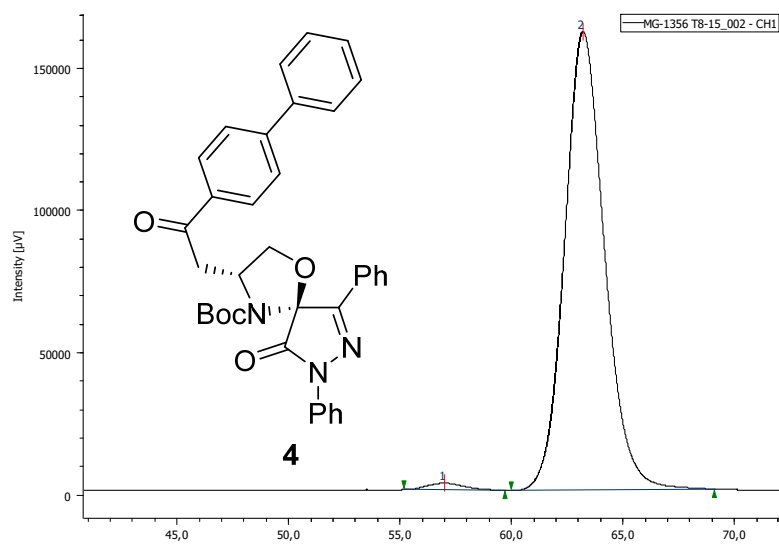

|   | $t_R$  | Area     | Area%  |
|---|--------|----------|--------|
| 1 | 56,983 | 274058   | 1,356  |
| 2 | 63,175 | 19932052 | 98,644 |



## Minor diastereomer

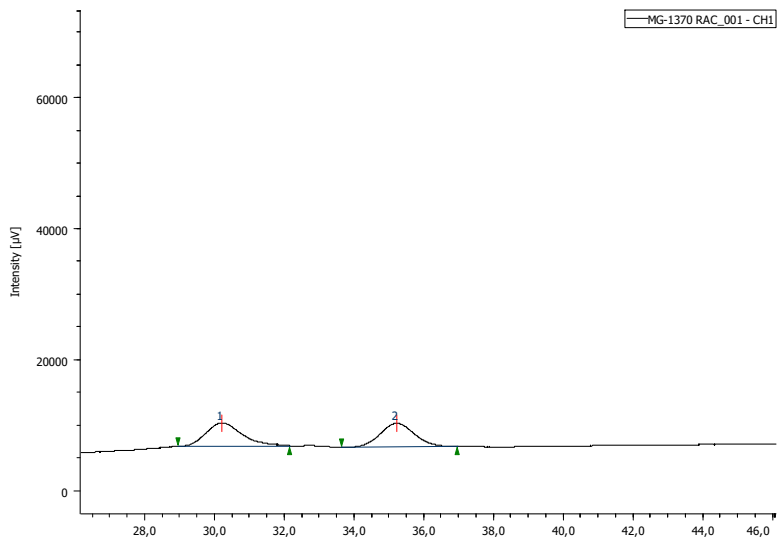

|   | <b>t<sub>R</sub></b> | <b>Area</b> | <b>Area%</b>  |
|---|----------------------|-------------|---------------|
| 1 | 30,208               | 253594      | <b>50,712</b> |
| 2 | 35,217               | 246477      | <b>49,288</b> |

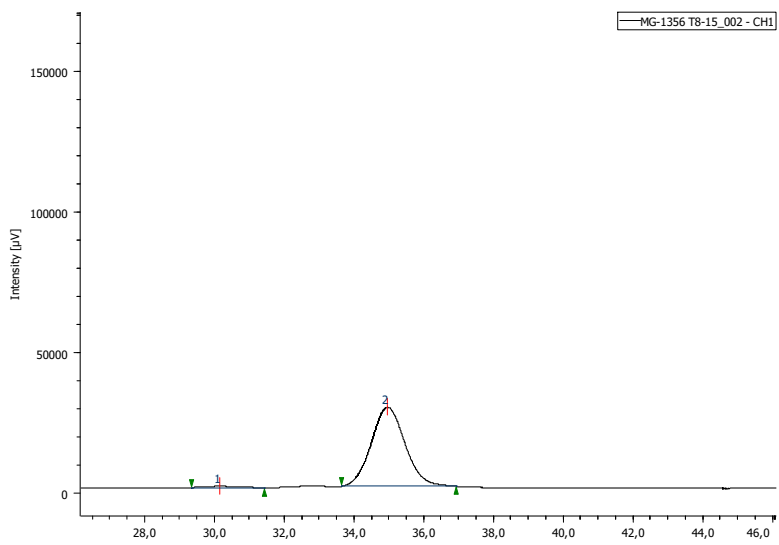

|   | <b>t<sub>R</sub></b> | <b>Area</b> | <b>Area%</b>  |
|---|----------------------|-------------|---------------|
| 1 | 30,142               | 33268       | <b>1,729</b>  |
| 2 | 34,958               | 1890386     | <b>98,271</b> |

***tert*-Butyl (S)-(4-(allyloxy)-5-oxo-1,3-diphenyl-4,5-dihydro-1*H*-pyrazol-4-yl)carbamate (5).**

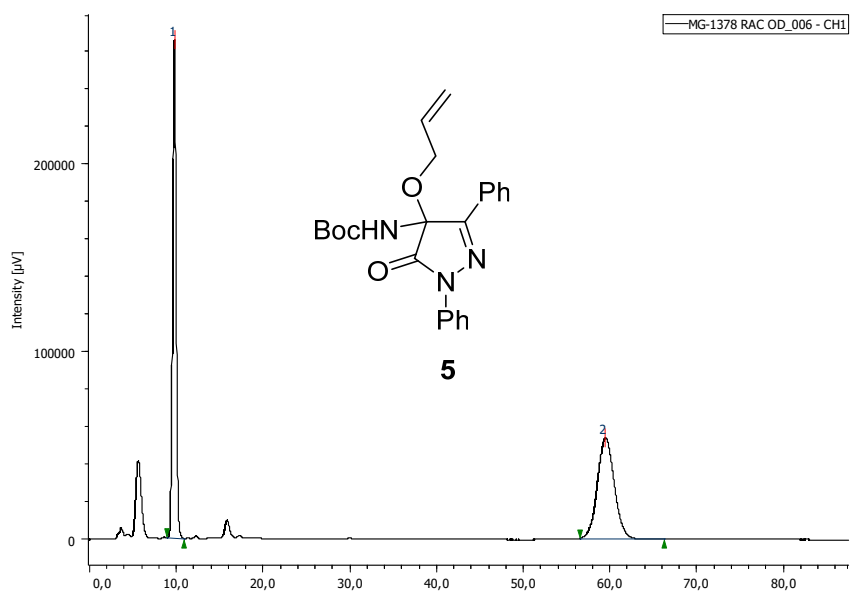

|   | <b>t<sub>R</sub></b> | <b>Area</b> | <b>Area%</b> |
|---|----------------------|-------------|--------------|
| 1 | 9,767                | 7502077     | 50,867       |
| 2 | 59,408               | 7246325     | 49,133       |

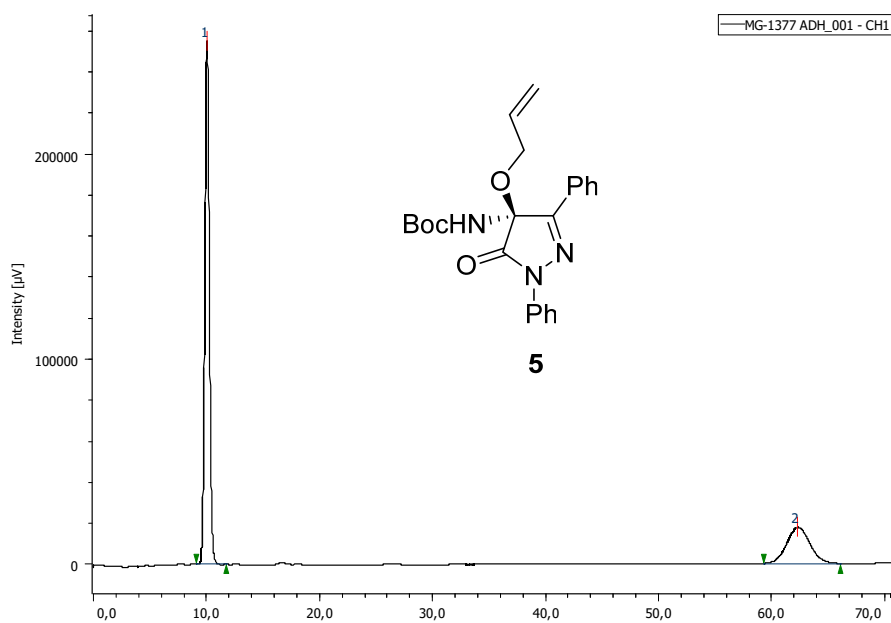

|   | <b>t<sub>R</sub></b> | <b>Area</b> | <b>Area%</b> |
|---|----------------------|-------------|--------------|
| 1 | 10,050               | 7200580     | 74,258       |
| 2 | 62,242               | 2496154     | 25,742       |

***tert*-Butyl (4-(allyloxy)-1-(4-chlorophenyl)-3-methyl-5-oxo-4,5-dihydro-1*H*-pyrazol-4-yl)carbamate (6).**

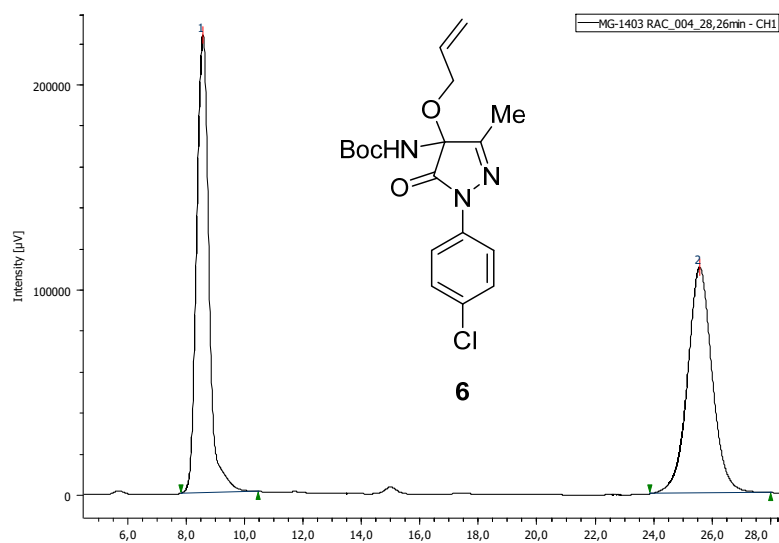

|   | $t_R$  | Area    | Area%  |
|---|--------|---------|--------|
| 1 | 8,567  | 6571775 | 50,571 |
| 2 | 25,542 | 6423384 | 49,429 |

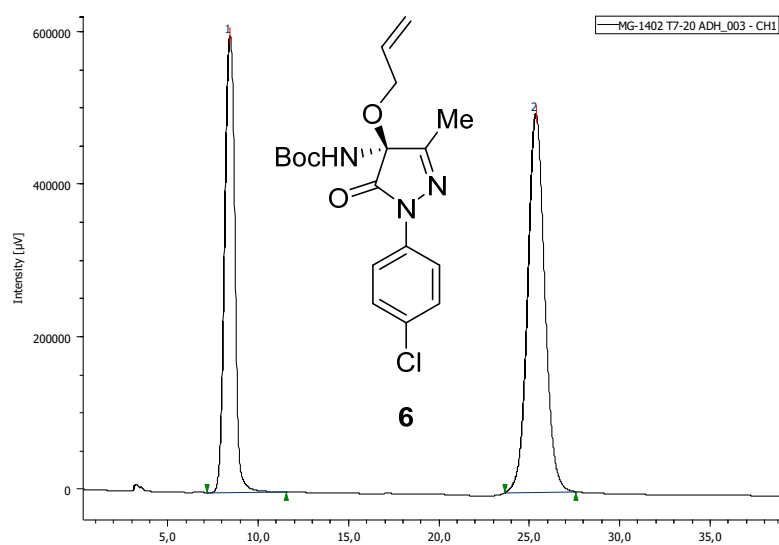

|   | $t_R$  | Area     | Area%  |
|---|--------|----------|--------|
| 1 | 8,442  | 23652866 | 42,058 |
| 2 | 25,325 | 32585857 | 57,942 |

#### 4. Crystallographic data of spirocycle 3ab.

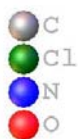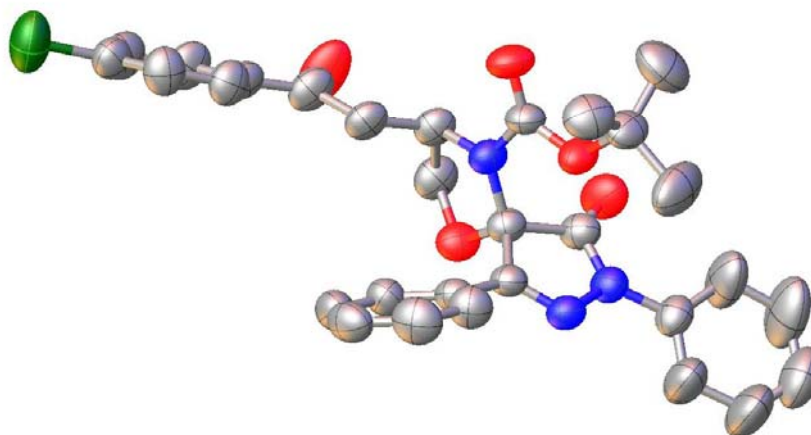

#### Crystal data and structure refinement for spirocycle 3ab.

|                                    |                                                                 |
|------------------------------------|-----------------------------------------------------------------|
| Identification code                | <b>3ab</b>                                                      |
| Empirical formula                  | C <sub>30</sub> H <sub>28</sub> ClN <sub>3</sub> O <sub>5</sub> |
| Formula weight                     | 546.00                                                          |
| Temperature/K                      | 298                                                             |
| Crystal system                     | orthorhombic                                                    |
| Space group                        | P2 <sub>1</sub> 2 <sub>1</sub> 2 <sub>1</sub>                   |
| a/Å                                | 8.3506(2)                                                       |
| b/Å                                | 11.0548(3)                                                      |
| c/Å                                | 35.8931(9)                                                      |
| α/°                                | 90                                                              |
| β/°                                | 90                                                              |
| γ/°                                | 90                                                              |
| Volume/Å <sup>3</sup>              | 3313.44(15)                                                     |
| Z                                  | 4                                                               |
| ρ <sub>calc</sub> /cm <sup>3</sup> | 1.095                                                           |
| μ/mm <sup>-1</sup>                 | 1.327                                                           |
| F(000)                             | 1144.0                                                          |
| Crystal size/mm <sup>3</sup>       | 0.737 × 0.372 × 0.3                                             |
| Radiation                          | Cu Kα (λ = 1.54184)                                             |
| 2θ range for data collection/°     | 8.37 to 150.626                                                 |
| Index ranges                       | -10 ≤ h ≤ 10, -13 ≤ k ≤ 13, -44 ≤ l ≤ 44                        |
| Reflections collected              | 26672                                                           |
| Independent reflections            | 6729 [R <sub>int</sub> = 0.0520, R <sub>sigma</sub> = 0.0308]   |
| Data/restraints/parameters         | 6729/0/355                                                      |
| Goodness-of-fit on F <sup>2</sup>  | 1.140                                                           |
| Final R indexes [I ≥ 2σ (I)]       | R <sub>1</sub> = 0.0932, wR <sub>2</sub> = 0.2551               |

Final R indexes [all data]  $R_1 = 0.1009$ ,  $wR_2 = 0.2768$   
Largest diff. peak/hole /  $e \text{ \AA}^{-3}$  1.30/-0.42  
Flack parameter 0.004(12)
